1 ***Cladosporium herbarum* peptidogalactomannan**  
2 **triggers significant defense responses in whole tobacco**  
3 **plants**

4 **Caroline de B. Montebianco<sup>1,2</sup>, Bianca B. Mattos<sup>2,3</sup>, Tatiane da F Silva<sup>4</sup>, Eliana**  
5 **Barreto-Bergter<sup>2</sup>, Maite F S Vaslin<sup>1</sup>**

6 <sup>1</sup>Departamento de Virologia, Instituto de Microbiologia Paulo de Góes (IMPPG), UFRJ, Rio de  
7 Janeiro, RJ, Brazil

8

9 <sup>2</sup>Departamento de Microbiologia Geral, Instituto de Microbiologia Paulo de Góes (IMPPG),  
10 UFRJ, Rio de Janeiro, RJ, Brazil.

11

12 <sup>3</sup>Embrapa Solos, Jardim Botânico. RJ, Brazil

13

14 <sup>4</sup>Escola de Engenharia de Lorena (EEL), Departamento de Biotecnologia (Debiq), Universidade  
15 de São Paulo (USP)

16

17 **Abstract**

18

19 *Cladosporium herbarum* is one of the most frequently occurring fungal species, with a  
20 worldwide distribution, and is found in almost all man-occupied niches in organic and  
21 inorganic matter and as a phytopathogen on certain agricultural crops. The structure of  
22 the most abundant glycoprotein from the *C. herbarum* cell wall, peptidogalactomannan  
23 or pGM, was previously elucidated and includes carbohydrates (76%), with mannose,  
24 galactose and glucose as its main monosaccharides (52:36:12 molar ratio). pGM was  
25 able to strongly induce the expression of defense-related genes and ROS accumulation  
26 when in contact with BY2 tobacco cells. Here, using two distinct *Nicotiana tabacum*  
27 cultivars, Xanthi and SR1, we evaluated the ability of *C. herbarum* pGM to induce  
28 SAR-like defense by studying its antiviral activity against *Tobacco mosaic virus* (TMV)  
29 and the induction of SAR markers including *PR* genes and ROS accumulation. Our  
30 results show that pGM induced a strong activation of defense responses in treated plants  
31 from both tobacco cultivars, contributing to the impairment of viral infection.  
32 Expression levels of the pathogenesis-related genes *PR-1a* (unknown function), *PR-2*  
33 ( $\beta$ -1-3 *endoglucanase*), *PR-3* (*chitinase*), and *PR-5* (*thaumatin-like protein*), the  
34 phenylpropanoid pathway gene *PAL* (*phenylalanine ammonia-lyase*) and genes  
35 involved in plant stress responses and innate immunity, such as *LOX1* (*lipoxygenase*)

36 and *NtPrxNI* (*peroxidase*), were strongly induced until 120 h after pGM spray  
37 application. Accumulation of superoxide radicals was also observed in a pGM dose-  
38 dependent manner.

39

## 40 **Introduction**

41 To face pathogen attack, plants have developed important pathways of  
42 response against infections, which include mainly the immunity associated with the  
43 recognition of conserved pathogen or microbe molecular patterns (PAMPs/MAMPs),  
44 such as fungal chitin or bacterial flagellin by plant cell receptors (PRRs) (reviewed by  
45 e.g. [1]). This first line of response is called PAMP-triggered immunity (PTI). To  
46 overcome PTI, pathogens develop effector molecules that enable them to successfully  
47 infect a host even when PTI is active. Plants, however, can face this by a second line of  
48 defense, effector-triggered immunity (ETI) [2, 3]. PTI may result in a decrease in  
49 pathogen colonization, consequently blocking the disease development and conferring  
50 basal resistance. Second, ETI confers resistance later, often resulting in a hypersensitive  
51 response (HR). Immunity directly associated with pathogen effectors is triggered by  
52 host cell identification of the effector itself or by effector-induced responses. This  
53 recognition accelerates and amplifies PTI-mediated responses, often leading to an HR at  
54 infection sites and to a systemic induction of resistance known as systemic acquired  
55 resistance (SAR). Once properly stimulated, SAR provides long-term defense against a  
56 broad spectrum of pathogens [4-8]. Therefore, a localized microbial infection in a single  
57 or in some leaves can immunize the rest of the plant against a subsequent infection. This  
58 phenomenon makes the plant temporally resistant to new infection events even if the  
59 subsequent infection occurs at a site far from the initial primary site.

60 *Cladosporium herbarum* is a fungus that is not pathogenic to humans, but the easy  
61 dispersion of its spores in air makes it an important airway allergen, leading to the  
62 development of respiratory diseases such as rhinitis, conjunctivitis and asthma [9]. In  
63 addition, it has also been described as a phytopathogen in some agricultural crops, such  
64 as passion fruit and corn. *C. herbarum* infects passion fruit, causing cladosporiosis,  
65 which reduces fruit production and quality [10]. In corn, it causes *Cladosporium* ear rot  
66 [11]. Cladosporiosis can occur by contaminated seedlings or wind-dispersed conidia  
67 [12], potentially affecting any aerial parts of the plant but mainly growing tissues such

68 as leaves, branches, flower buds and fruits, negatively impacting plant development and  
69 production [13].

70 The cell walls of members of the *Cladosporium* genus have a complex composition  
71 consisting mainly of polysaccharides (80-90%) and, to a lesser extent, proteins,  
72 glycoproteins and lipids [14]. Chitin and  $\beta$ -glucans are the main polysaccharides and are  
73 located in the inner layer of the cell wall, whereas glycoproteins are anchored in the  
74 outermost layer [15-17]. Fungal cell wall composition may vary according to the  
75 morphological type, growth stage and fungal species and is different from the plant cell  
76 wall composition, which mainly includes cellulose [18]. Among the fungal cell wall  
77 glycoproteins, peptidogalactomannan (pGM) can be found in various fungi, such as  
78 *Cladosporium werneckii*, *C. resinae*, *Aspergillus fumigatus*, *Aspergillus wentii*,  
79 *Malassezia* species and *Chaetosartorya chrysella* [19-22].

80 In a previous study, the *Cladosporium herbarum* pGM structure was elucidated and  
81 found to include carbohydrates (76%) and mannose, galactose and glucose as its main  
82 monosaccharides (52:36:12 molar ratio). The presence of a main chain containing  
83 (1 $\rightarrow$ 6)-linked  $\alpha$ -D-Man<sub>p</sub> residues was observed by methylation and <sup>13</sup>C-nuclear  
84 magnetic resonance (<sup>13</sup>C-NMR) spectroscopy [23].  $\beta$ -D-Galactofuranosyl residues were  
85 present as (1 $\rightarrow$ 5)-interlinked side chains of *C. herbarum* pGM. The role of pGM cell  
86 wall glycoprotein in plant-fungus interactions was first studied by Mattos *et al.* [23],  
87 who showed the induction of the expression of defense genes in tobacco BY2 cells and  
88 a hypersensitive response (HR) after treatment of tobacco leaves with *C. herbarum*  
89 pGM. This recognition and defense response activation would possibly contribute to the  
90 plant response to the pathogen attack, protecting itself against new infections and  
91 indicating that pGM is probably able to induce SAR.

92 Here, using two distinct *Nicotiana tabacum* cultivars, Xanthi and SR1, we evaluated the  
93 ability of *C. herbarum* pGM to induce antiviral activity against *Tobacco mosaic virus*  
94 (TMV), PR genes and oxygen-reactive species (ROS) accumulation. Our results showed  
95 that pGM treatment induced a SAR-like response in both tobacco cultivars with strong  
96 activation of defense responses by the treated plants, enabling them to impair the viral  
97 infection.

98

## 99 **Material and Methods**

## 100 **Strain and culture conditions**

101 *Cladosporium herbarum*, CBS 121621, was provided by Dr J. Guarro,  
102 Advanced Studies Institut, Réus, Spain and was maintained in potato dextrose broth  
103 (PDB/Acumedica) in Erlenmeyer flasks at room temperature for 7 days with shaking.  
104 Mycelium was obtained via filtration, washed with distilled water and stored at -20°C.

105

## 106 **Extraction of *C. herbarum* glycoprotein**

107 Crude glycoprotein extraction was performed according to [22]. Briefly, *C.*  
108 *herbarum* mycelium was extracted with 0.05 M phosphate buffer, pH 7.2, at 100°C for  
109 2 h. The mixture was filtered, and the filtrate was evaporated into a small volume and  
110 precipitated with three volumes of ethanol overnight at 4°C. The precipitate was  
111 dialyzed and freeze-dried to obtain the crude glycoprotein (pGM). pGM purity was  
112 checked by HPTLC and GC-MS as described by Mattos *et al.*, [23] and no  
113 contaminants were present.

114

## 115 **Plant growth and pGM treatment**

116 *N. tabacum* cv. Xanthi and cv. SR1 seeds were germinated and grown in  
117 substrate in a greenhouse at  $25 \pm 2^\circ\text{C}$  with a natural photoperiod. Young adult tobacco  
118 plants with 4-6 true leaves were sprayed with  $600 \mu\text{g}\cdot\text{ml}^{-1}$  of water diluted pGM with a  
119 high-pressure apparatus (W550, Wagner) according to [24]. MilliQ water was sprayed  
120 as control. Four pGM assay experiments were performed with Xanthi cv. with 16 plants  
121 sprayed with pGM and mechanically infected with TMV 24 h later and 16 plants  
122 sprayed with water and mechanically infected with TMV 24 h later in each experiment.  
123 Plants without treatment were used as healthy controls, plants only mechanically  
124 inoculated with TMV were used as TMV inoculation controls, plants treated with pGM  
125 were used as pGM control plants, and plants just sprayed with water were used as water  
126 treated ( $\text{H}_2\text{O}$ ) controls (mock). pGM assays with SR1 cv. were carried out 3 times with  
127 10 plants used for each control (healthy plants, pGM alone,  $\text{H}_2\text{O}$ -mock and TMV alone)  
128 and 15 plants for pGM + TMV and 15 for  $\text{H}_2\text{O}$  + TMV in each experiment.  
129 Immediately before spraying, pGM was resuspended in MilliQ water, and the  
130 suspension was sterilized by filtration in a Millipore  $0.20 \mu\text{m}$  filter.

131

## 132 ***Tobacco mosaic virus (TMV) infection and evaluation of*** 133 **disease severity**

134 For TMV mechanical infection, 1 g of TMV-infected frozen leaves (-80° C) was  
135 ground with a mortar and pestle in 19 ml of 0.01 M potassium phosphate buffer pH 7.0  
136 to obtain the viral suspension [25]. Twenty-four hours after water or pGM treatment, the  
137 first 3 true leaves of each plant were mechanically inoculated with TMV without the use  
138 of abrasive. Experiments were carried out 4x with *N. tabacum* Xanthi and 3x with *N.*  
139 *tabacum* SR1 plants.

140 For cv. Xanthi, 48 hours post infection (hpi) with TMV, the disease incidence was  
141 measured by direct counting of necrotic lesions in each infected leaf, as described by  
142 [26], where the number of necrotic lesions was expressed as the infection percentage.

143 To assess TMV disease severity in pGM treated cv. SR1 plants, the plants were  
144 evaluated by visual observation 25 days post TMV infection (dpi) using a 0-5 disease  
145 scale. In this scale, the value 0 corresponds to the absence of symptoms; 1 to one or two  
146 leaves showing light mottling; 2 to more than two leaves showing light mottling with  
147 few thin yellow veins; 3 to mottling and vein clearing unevenly distributed on the leaf; 4  
148 to mottling, leaf distortion, and stunting; and 5 to severe mottling, leaf curling, and  
149 stunting. The severity of the disease was quantified using the disease index (DI%)  
150 proposed by [27], applying the following formula:  $DI = \sum(DS \times P)/(TNP \times HGS) \times 100$ ,  
151 where DS = degree of the scale determined for each plant; P = number of plants  
152 showing each degree of infection (score); TNP = total number of plants evaluated; and  
153 HGS = highest grade of the scale (maximum infection score).

154

## 155 **ELISA assays**

156 Enzyme-Linked Immunosorbent Assays (ELISA) analyses were carried out to  
157 measure the amount of the virus in leaf samples using PathoScreen® (Agdia) ELISA kit  
158 for specific detection of tobamovirus family including TMV following Agdia protocol.  
159 Leaf samples of water- and pGM-treated SR1 plants inoculated with TMV were  
160 collected 72 h after virus infection. Each sample was ground in a 1:10 (leaf:extraction  
161 buffer (Adgia Co.) dilution and then loaded onto ELISA 96-well plates. Tests were  
162 performed in technical triplicates and the plates were read using a microplate  
163 spectrophotometer from BioRad Co.. Virus quantification was obtained using the  
164 standard curve of a  $1.0 \times 10^7$  TMV particles/g of leaf sample serial dilution.

165

## 166 **Measurement of superoxide radical accumulation in leaves** 167 **treated with pGM**

168 Evaluation of superoxide radical accumulation was performed using nitroblue  
169 tetrazolium (NBT) staining according to [28]. Leaves sprayed with 100, 200, 400 and  
170 600  $\mu\text{g}\cdot\text{ml}^{-1}$  of pGM were collected after 24 and 72 h and 8 and 10 days after spray  
171 application and incubated with NBT at 0.5  $\text{mg}\cdot\text{ml}^{-1}$  for 1 h in vacuum. Subsequently,  
172 leaves were immersed in 95% boiling ethanol until for total removal of chlorophyll.

173

## 174 **Analysis of defense gene expression by qRT-PCR**

175 Total RNA was extracted from young leaves between 24 and 120 h after  
176 treatment with water or 600  $\mu\text{g}\cdot\text{ml}^{-1}$  pGM using TRIzol® Reagent (AmbionRNA by  
177 Life Technologies™) according to the manufacturer's instructions. RNA concentration  
178 and purity were determined using a NanoDrop2000 Spectrophotometer (Thermo  
179 Scientific Co.). RNA integrity was assessed using 1% agarose gel electrophoresis and  
180 ethidium bromide staining. One microgram of total RNA from each sample was treated  
181 with RQ1 RNase-Free DNase (Promega Co.) according to the manufacturer's  
182 instructions. Complementary DNA (cDNA) synthesis was performed with a Revert Aid  
183 First Strand cDNA Synthesis Kit (Fermentas Co.) and 100  $\mu\text{M}$  of OligodT primer using  
184 1  $\mu\text{g}$  of total RNA as a template, according to the manufacturer's instructions. Following  
185 cDNA synthesis, the samples were diluted 25-fold in sterile water. Primers for qPCR,  
186 described by [23], were designed for seven defense-related genes (*PR-1a*, *PR-2*, *PR-3*,  
187 *PR-5*, *NtPrxNI*, *LOXI* and *NtPAL*) and two constitutively expressed genes (*PP2A* and  
188 *Nt-ACT9*). Amplification reactions were performed on an Applied Biosystems® 7500  
189 Fast Real-Time PCR apparatus using a 96-well plate. All reactions were performed  
190 using two independent biological pools composed of leaves of 5 independent plants  
191 each. Three technical triplicates were analyzed for each biological replication. Three  
192 negative controls without cDNA were included on the plate for each primer. A mix was  
193 performed according to the manufacturer's instructions containing the specific primer  
194 pairs for each gene at 10  $\mu\text{M}$  and SYBR Green/ROX qPCR Master Mix (Thermo  
195 Scientific). cDNA amplification reactions were performed in a final volume of 25  $\mu\text{l}$ ,  
196 according to the manufacturer's guidelines. qPCR cycles were 10 minutes at 95°C for  
197 initial denaturation, followed by 40 cycles of denaturation at 95°C for 15 sec and

198 annealing/extension at 60°C for 1 minute, except for the PAL and PR5 genes, for which  
199 the annealing temperature was adjusted to 62°C [23]. The results were analyzed by the  
200  $2^{-\Delta\Delta CT}$  method according to [29].

201

## 202 **Statistical analysis**

203 Statistical analyses were performed using GraphPad Prism software version 5.00  
204 for Windows using “ONE-WAY ANOVA” Bonferroni test to evaluate if total number  
205 of TMV-induced necrotic lesions differ significantly between pGM treated and water-  
206 treated plants and compare ELISA results between treatments. Disease severity index  
207 between treatments were compared using One Way ANOVA Kruskal-Wallis and  
208 Dunn’s Multiple Comparison Test and “TWO-WAY ANOVA” Bonferroni test was  
209 used to evaluate qRT-PCR results.

210

## 211 **Results**

### 212 **pGM induces tolerance against TMV infection in tobacco**

#### 213 **plants**

214 To evaluate the potential of *C. herbarum* pGM in inducing virus defense in *N.*  
215 *tabacum*, tobacco plants from two distinct cultivars were sprayed with 600 µg.ml<sup>-1</sup>  
216 pGM and mechanically inoculated with TMV 24 hours later. Forty-eight hours after  
217 TMV infection, plants from the tobacco cultivar Xanthi sprayed with water showed  
218 TMV-induced typical necrotic lesions (Fig 1A middle panel). Plants sprayed with pGM,  
219 however, showed a reduction in the number of necrotic lesions after TMV infection. A  
220 reduction of 42% in the number of necrotic lesions was observed when comparing  
221 water- and pGM-treated plants after TMV challenge and of 51% comparing pGM-  
222 treated and untreated TMV-infected plants (TMV infection control) (Fig 1B). Statistical  
223 analyses, however, showed that the number of necrotic lesions of water-treated and  
224 untreated plants were similar. Seven days after TMV infection, leaves at position 3 of  
225 plants previously sprayed with water showed 2.6x more necrotic lesions than leaves at  
226 the same position of pGM-sprayed plants (Fig 1C and 1D).

227

228 **Figure 1: pGM treatment induced a reduction in the number of TMV induced**  
229 **necrotic lesions in *Nicotiana tabacum* cv. Xanthi.** *N. tabacum* cv. Xanthi were treated  
230 with water or pGM and mechanically inoculated with TMV 24 hours later. (A) Details  
231 of representative leaves 7 dpi with TMV. Upper panel shows TMV infected untreated  
232 plants. Middle and bottom panels show leaves from water and pGM-treated plants,  
233 respectively. (B) Number of necrotic lesions in pGM treated plants. Dot plots represent  
234 the sum of the necrotic lesions observed in leaves 1-3 of each plant after TMV infection  
235 in untreated (n=10), H<sub>2</sub>O (n=20) and pGM (n=20) treated plants. Horizontal bars  
236 represent average values and vertical bars SE. The percentage of necrotic lesions  
237 reduction is shown over the dots and \*\*\* indicates significant differences with  $p <$   
238 0.001. (C) pGM treatment experimental scheme. After pulverization, leaves 1-3 were  
239 infected with TMV. (D) Total number of TMV-induced necrotic lesions at leaves 1-3  
240 after each treatment from a representative experiment. Different letters represent  
241 statistical differences between the treatments for each leaf position with a  $p$  value  $<$   
242 0.05. Experiments were repeated two times. pGM - peptidogalactomannan. TMV -  
243 *Tobacco mosaic virus*. Bar: 1 cm

244

245 Tobacco plants from the TMV-susceptible cv. SR1 were similarly assayed. Symptoms  
246 of TMV infection were evaluated 3 weeks after infection. Typical symptoms of tobacco  
247 mosaic disease were visible since 18 dpi on untreated control as well as on water-treated  
248 plants. A strong reduction in disease symptoms was observed in pGM-treated plants,  
249 where only mild symptoms were observed. Fig 2A shows representative leaves of pGM  
250 treated infected plants. A disease severity index was used to compare TMV disease  
251 severity of individual plants after each treatment. As shown in Table 1, the pGM  
252 treatment induced a decrease between 76-80% in the disease severity compared to  
253 treatment with water, suggesting that pre-treatment with pGM could confer protection  
254 to the plants against TMV infection. Elisa assays performed in the infected plants  
255 showed that viral accumulation decreased 10 times on pGM-treated TMV infected SR1  
256 plants compared to water-treated TMV infected plants (Table 1 and Fig 2B).

257 So, pGM treatment was able to induce virus tolerance in both tobacco cvs., with a  
258 reduction in the number of necrotic lesions in Xanthi and an important decrease of  
259 mosaic disease in SR1.

260



261 **Figure 2: pGM treatment induced TMV tolerance in *N. tabacum* cv. SR1.** *N.*  
262 *tabacum* cv. SR1 were treated with water or pGM and mechanically inoculated with  
263 TMV after 24 h. (A) Leaves of controls (upper panel) and water and pGM-treated TMV  
264 infected plants 22 dpi. (B) TMV accumulation seventy two hours post TMV  
265 inoculation. Levels of TMV particles were assayed in water and pGM treated plants by  
266 ELISA assay. ODs observed in water and pGM treated plants were plotted in a TMV  
267 quantification standard curve. Boxes are showing the average number of TMV particles  
268 per g of leaf. Vertical bars are showing SE and the horizontal bar shows ANOVA  
269 Bonferroni test comparing viral accumulation on water and pGM treatment with  $p <$   
270 0.01.

271

272 **Table 1: Response of tobacco SR1 pGM treated plants to tobacco mosaic virus**  
273 **(TMV).**

| Treatments       | Number of symptomatic plants*<br>Experiment 1 | Disease severity index (%)**<br>Experiment 1 | Number of symptomatic plants*<br>Experiment 2 | Disease severity index (%)**<br>Experiment 2 | TMV detection by ELISA (415 nm) <sup>§</sup> | TMV quantification      |
|------------------|-----------------------------------------------|----------------------------------------------|-----------------------------------------------|----------------------------------------------|----------------------------------------------|-------------------------|
| untreated        | 10/10 a                                       | 100.0 a                                      | 10/10 a                                       | 100.0 a                                      | 1.70 ± 0.14 a                                | 1.0 x 10 <sup>5</sup> a |
| H <sub>2</sub> O | 20/20 a                                       | 100.0 a                                      | 20/20 a                                       | 100.0 a                                      | 1.29 ± 0.03 a                                | 2.0 x 10 <sup>5</sup> a |
| pGM              | 12/20 b                                       | 20.0 b                                       | 14/20 b                                       | 24.0 b                                       | 0.35 ± 0.17b                                 | 1.0 x 10 <sup>4</sup> b |

274 Number of TMV symptomatic per infected plants (\*) and a disease severity index (\*\*)  
275 shown by *N. tabacum* cv. SR1 25 dpi with TMV for the distinct treatments from two  
276 independent experiments.

277 § - ODs average and SE obtained by TMV ELISA detection at 415 nm.

278 Column 7 shows the average number of TMV particles per g of infected leaf in each  
279 treatment.

280 Different letters correspond to significant differences with  $p < 0.001$ . Statistical analysis  
281 was performed using One way ANOVA Bonferroni test (columns 2-4 and 6-7) and  
282 Kruskal-Wallis and Dunn's Multiple Comparison Test (columns 3 and 5).

283

## 284 **ROS accumulation in pGM-treated tobacco plants**

285 It is proposed that ROS can act as defense compounds against viruses [30, 31].  
286 H<sub>2</sub>O<sub>2</sub> can act as a systemic antiviral signaling molecule during TMV infection;  
287 however, the role of ROS in plant-virus interactions is not completely understood [32].  
288 The accumulation of ROS is also considered a biochemical marker of SAR induction  
289 [31].

290 To check if pGM treatment induces ROS accumulation in the tobacco treated plants, we  
291 examined the presence of ROS in the pGM-sprayed plants. Leaves from plants sprayed  
292 with different pGM concentrations (100, 200, 400 and 600  $\mu\text{g}\cdot\text{ml}^{-1}$ ) were analyzed over  
293 time, and the presence of superoxide radicals was assayed using nitroblue tetrazolium  
294 (NBT) reduction and histological staining. Figure 3 illustrates the accumulation of  
295 superoxide radicals after treatment with different pGM concentrations. We observed a  
296 dose-dependent effect of pGM spray on superoxide radical accumulation. Superoxide  
297 accumulation was observed from 24 h to 10 days after pGM spray for all pGM  
298 concentrations analyzed. After 8 days, however, a decay in its accumulation was  
299 observed. Curiously, 400  $\mu\text{g}\cdot\text{ml}^{-1}$  pGM showed a stronger induction of superoxide  
300 radical accumulation than 600  $\mu\text{g}\cdot\text{ml}^{-1}$ , showing that the capacity of ROS induction of  
301 pGM may be saturated at higher concentrations. Histological assays to detect the  
302 presence of hydrogen peroxide in these plants using 3,3-diaminobenzidine (DAB) were  
303 also performed; however, DAB deposition was not observed (data not shown).

304

305 **Figure 3: pGM is inducing superoxide radical accumulation in pGM-treated**  
306 **Xanthi plants.** The accumulation of superoxide radicals after spray of pGM at different  
307 concentrations (100, 200, 400 and 600  $\mu\text{g}\cdot\text{ml}^{-1}$ ) was evaluated along 10 days using  
308 nitroblue tetrazolium (NBT). Representative leaves of each treatment are shown. dap -  
309 days after pGM pulverization. Bar: 1cm.

310

## 311 **pGM treatment induces defense gene expression in tobacco** 312 **plants**

313 To analyze whether pGM spray induces defense-related gene expression in  
314 treated plants, the transcript levels of the *pathogen-related 1-3* and *5* (*PR1 $\alpha$* , *PR2*, *PR3*  
315 and *PR5*), as well as *peroxidase N1* (*NtPrxN1*), *phenylalanine ammonia-lyase* (*PAL*) and  
316 *lyxogenase 1* (*LOX1*) genes, were evaluated over time in *N. tabacum* plants from cvs.  
317 Xanthi and SR1 after spray application of 600  $\mu\text{g}\cdot\text{ml}^{-1}$  pGM.

318 pGM induced the expression of all PR genes analyzed 24 h after treatment in both  
319 tobacco cvs (Fig 4). A very strong induction of the *PR1- $\alpha$*  expression, a classical SAR  
320 marker, was observed in Xanthi. Twenty-four hours after pGM spray, *PR1- $\alpha$*  expression  
321 was more than 2000-fold compared to that in control plants sprayed with water.  
322 However, this gene expression decreased 24 h later and increased again 72 h after pGM

323 treatment but at lower levels than during the first 24 h. Looking at the *PR1- $\alpha$*  expression  
324 in cv. SR1, we observed a more pronounced expression at 72 h, reaching approximately  
325 300-fold that of the control. An up- and down-regulation cycle was observed in plants  
326 from this cv., where we observed an increase of more than 30x in *PR1- $\alpha$*  expression in  
327 the first 24 h, followed by a small decrease of 4x at 48 h and again a drastic increase at  
328 72 h. After that, *PR1- $\alpha$*  expression levels decreased again at 96 h and returned to high  
329 levels at 120 h. In summary, *PR1- $\alpha$*  was strongly induced by pGM treatment in both  
330 tobacco cultivars, however, in Xanthi, the induction and its decay occurred earlier than  
331 in SR1. The presence of high levels of *PR1* transcripts in SR1 pGM-treated plants after  
332 96 and 120 h after pGM spray may indicate that pGM treatment is in fact inducing  
333 systemic spreading signals over the sprayed leaves as the leaves samples of these two  
334 points developed after pGM treatment.

335

336 **Figure 4: qRT-PCR analysis of some PR genes in water and pGM-treated plants**  
337 **between 24 and 120 h after treatment.** Axis y is showing the fold change of *PR1- $\alpha$* ,  
338 *PR2*, *PR3* and *PR5* transcripts levels in *N. tabacum* cv. Xanthi and cv. SR1 after pGM  
339 treatment in comparison with water treatment calculated using  $2^{-\Delta\Delta C_t}$  method described  
340 by [29]. *PP2A* and *NtACT-9* were used as reference genes. The standard deviations are  
341 indicated by error bars, and significant differences between fold changes with  $p < 0.05$   
342 and  $p < 0.001$  are indicated by \* and \*\*\*, respectively. *PR1- $\alpha$* : Unknown function,  
343 possible antifungal function; *PR2*:  $\beta$ - (1,3) endonuclease; *PR3*: chitinase; *PR5*:  
344 *thaumatin-like protein*. *PP2A* and *NtACT-9* were used as reference genes.

345

346 Xanthi and SR1 showed 30- and 14-fold increases in *PR-2* ( $\beta$ -1,3 glucanase) gene  
347 expression after 24 h, respectively (Fig 4). After this time, however, *PR-2* mRNA levels  
348 were little reduced in water- and pGM-treated Xanthi plants and little induced in SR1,  
349 showing an early induction only of this specific gene. *PR-3*, which encodes the  
350 *chitinase* gene, showed a very low induction (3x) in Xanthi in the first 24 h but an  
351 increase of 50x in SR1 plants at the same time. With increasing time, an elevation in its  
352 expression was observed, reaching more than 45-fold that of the control at 72 h in  
353 Xanthi. SR1 *PR-3* induction mediated by pGM was stronger and peaked at 96 h after  
354 pGM treatment (more than 900-fold change expression) and decreased with time.  
355 Expression of *PR-5*, which encodes a *thaumatin-like protein* gene, was 45- and 5-times

356 higher than that of the control after 24 h in Xanthi and SR1 plants, respectively,  
357 decreasing with time in Xanthi.

358 *NtPrxNI* (*peroxidase*) transcripts were highly induced in Xanthi as well in SR1,  
359 reaching values more than 200x at 24 and 72 h and 110x at 72 h in Xanthi and SR1,  
360 respectively (Fig 5). The high expression of the *peroxidase* gene may indicate that  
361 abnormal levels of ROS accumulated after pGM treatment in both cultivars. Leaves that  
362 developed after pGM spray, however, did not show *NtPrxNI* mRNAs induction (Fig 5,  
363 96 and 120 h).

364

365 **Figure 5: qRT-PCR analysis of defense related genes in water and pGM-treated**  
366 **plants between 24 and 120 hours after treatment.** Axis y is showing average fold  
367 changes between transcripts levels of *NtPrxNI* (*peroxidase*), *PAL* (*phenylalanine*  
368 *ammonia-lyase*) and *LOX* (*lipoxygenase*) of *N. tabacum* cv. Xanthi and cv. SR1 after  
369 pGM treatment in comparison with water treatment calculated using  $2^{-\Delta\Delta Ct}$  method  
370 described by [29]. *PP2A* and *NtACT-9* were used as reference genes. The standard  
371 deviations are indicated by error bars, and significant differences between fold changes  
372 with  $p < 0.05$  and  $p < 0.001$  are indicated by \* and \*\*\*, respectively.

373

374 The *PAL* (*phenylalanine ammonia-lyase*) gene was also induced in both tobacco  
375 cultivars; however, the time course of *PAL* expression was different between them. In  
376 Xanthi, expression was induced earlier, reaching its highest level at 24 h after pGM  
377 spray application (24x). After this time point, the expression decreased to levels similar  
378 to those of the control. In SR1, however, the expression was only 5x more than that of  
379 the control at 24 h, reaching a maximum at 120 h, where it was expressed 130-fold  
380 compared with the control. *LOX* (*lipoxygenase*) gene, also associated with oxidative  
381 stress, was strongly induced (425x) in Xanthi plants at 72 h after pGM treatment. In  
382 SR1 plants, a comparatively slighter expression (27x) of this gene was observed,  
383 peaking at 24 h after pGM treatment.

384 Our RT-qPCR assays showed that almost all of the *PRs* and defense-related genes  
385 analyzed were strongly induced by pGM treatment. Our results indicated that pGM is  
386 responsible for the activation of a local systemic defense, observed in samples collected  
387 between 24-72 h. Results obtained from SR1 leaves that do not receive pGM directly  
388 (collected at 96 and 120 h), suggest that pGM may be an SAR inducer.

389

## 390 Discussion

391 The present work aims to unravel the role of the *C. herbarum* cell wall  
392 peptidogalactomannan (pGM) as a plant defense elicitor. Treatment of young *Nicotiana*  
393 *tabacum* cv. Xanthi plants with pGM before TMV infection caused a reduction of 51  
394 and 42% in the number of TMV-induced necrotic lesions when compared with  
395 untreated plants and water-sprayed plants, respectively. In *N. tabacum* cv. SR1 plants,  
396 decrease of 76-80% in disease severity was detected after treatment with *C. herbarum*  
397 pGM, showing that pGM treatment is able to promote protection against the viral  
398 pathogen in both tobacco cvs. In agreement, ELISA assays confirmed a reduction in the  
399 viral accumulation after treatment. In addition, we also observed a dose-dependent  
400 accumulation of superoxide radicals in pGM-treated plants. Superoxide radical  
401 accumulation seemed to be especially high during the first 24 h after pGM treatment,  
402 decreasing after 10 days. It was interesting to observe that even doses lower than 600  
403  $\mu\text{g}\cdot\text{ml}^{-1}$ , used in this work, and 400  $\mu\text{g}\cdot\text{ml}^{-1}$ , previously used with BY2 tobacco cells  
404 [23], were able to induce the accumulation of superoxide radicals, indicating that  
405 oxidative stress mediated by ROS is induced in leaves after pGM treatment. A  
406 significant strong increase in expression of *NtPRI- $\alpha$*  transcript levels was also observed  
407 after treatment. The *PRI- $\alpha$*  gene is an SAR marker associated with salicylic acid (SA)  
408 and SAR signaling. Our data showed that in Xanthi as well as in SR1 tobacco plants,  
409 *PRI- $\alpha$*  transcript levels were highly induced, suggesting local defense and possible SAR  
410 were induced by pGM. Importantly, pGM treatment did not induce any damage to the  
411 fitness of the plants. In contrast, treated plants even showed slight growth enhancement  
412 compared to water- and untreated plants (data not shown).

413 Recently, our group showed that treatment of tobacco roots and BY2 cells with *C.*  
414 *herbarum* pGM induces oxidative stress and the expression of *PRI- $\alpha$*  and other defense-  
415 related genes [23]. In addition, an HR-like response was observed when pGM was  
416 infiltrated in tobacco leaves. To our knowledge, our results show for the first time that a  
417 peptidogalactomannan isolated from the *C. herbarum* cell wall is able to induce local  
418 and systemic defense responses in a whole plant. In the literature, other reports have  
419 shown that distinct glycoproteins are able to confer SAR protection to a plant. Baillieul  
420 *et al.* [33] and Cordelier *et al.* [34], using a 32 kDa glycoprotein named alpha-elicitin  
421 secreted by the oomycete *Phytophthora megasperma*, demonstrated the induction of the  
422 HR and the production of enzymes related to SAR after its administration in tobacco

423 leaf mesophyll. A reduction in the size of TMV-induced necrotic lesions in leaves was  
424 observed after treatment with the glycoprotein. These studies, however, did not show a  
425 reduction in the number of necrotic leaves, as observed in our work. In addition to the  
426 reduction in the number of necrotic lesions observed on the HR TMV-resistant tobacco  
427 Xanthi, we also observed a reduction in protection mediated by pGM in TMV-  
428 susceptible SR1 cv., with a strong reduction in disease severity. Glucan 1,4-alpha-  
429 glucosidase (BcGs1), isolated and purified from *Botrytis cinerea* culture supernatant,  
430 was also able to induce SAR in tomato and tobacco plants [35]. Enzyme-treated plants  
431 showed the induction of necrotic lesions that mimicked a typical HR. H<sub>2</sub>O<sub>2</sub> production  
432 was also increased in the treated tomato and tobacco plants that exhibited resistance to  
433 *B. cinerea*, *Pseudomonas syringae* pv. tomato DC3000 and *Tobacco mosaic virus* along  
434 with an increase in the transcript levels of the defense-related genes *PR1-α*, *TPK1b* and  
435 prosystemin and a reduction of approximately 40% in TMV-induced necrotic lesions.  
436 Several authors also reported the use of bacterial, fungal and oomycete culture filtrates  
437 and/or secreted molecules to induce plant defense responses. The protein PemG1, an  
438 elicitor molecule isolated from *Magnaporthe grisea* culture medium and expressed in an  
439 *E. coli* heterologous system, induced resistance to bacterial pathogens in rice and  
440 *Arabidopsis* [36]. Treatment with PemG1 did not inhibit bacterial growth but increased  
441 plant resistance, indicating that PemG1 is an SAR elicitor. LI *et al.* [37] described a  
442 novel HR-inducing protein elicitor, called PeFOC1, isolated from the culture filtrate of  
443 *Fusarium oxysporum* f. sp. *cubense*. This protein induced ROS and an HR in tobacco  
444 cells and induced the expression of *PR* genes (with upregulation of *PAL*, *EDS1*, *LOX*  
445 and *PDF*). The SA and JA/ET signaling pathways were activated with the consequent  
446 induction of callose and phenolic compound deposition, causing an immune response  
447 and SAR in tobacco. A study by KWAK and collaborators [38] showed that an  
448 uncharacterized fraction obtained from aqueous extraction of the fungus *Hericium*  
449 *erinaceus* induces defense genes and promotes plant growth and death of the bacteria  
450 that cause disease in tomatoes.  
451 In our previous work, we observed that the expression of defense-related genes such as  
452 *PrxNI*, *PAL*, *LOX* and the pathogen-related genes *PR1-α*, *PR-2* and *PR-3* were strongly  
453 induced after the treatment of tobacco BY2 cells with pGM [23]. In the present work,  
454 we observed that treatment of both tobacco Xanthi and SR1 with pGM also induced the  
455 expression of *PR-1α*, *PR-2*, *PR-3*, *PR-5*, *LOX1*, *PAL* and *NtPrxNI*. The strong induction  
456 of *PR1-α* and *PR-2* transcripts after pGM treatment suggests a possible SAR activation

457 by pGM. Despite small differences in the expression levels in Xanthi and SR1, we  
458 observed that defense response induction mediated by pGM persisted for at least 3 and  
459 5 days based on *PR1- $\alpha$*  and *PR-2* qRT-PCR results and the NBT assay.  
460 Overexpression of *PR1- $\alpha$*  as well as other defense-related genes seems to directly  
461 contribute to elicitor-mediated pathogen resistance, as already demonstrated by [39].  
462 The ability of PR genes to enhance resistance against both biotic and abiotic stresses is  
463 well documented. A strong induction of more than 2000x and 35x of the *PR1- $\alpha$*  gene  
464 during the first 24 hours after pGM treatment was detected in both Xanthi and SR1  
465 tobacco plants, respectively, showing that the expression of the *PR1- $\alpha$*  SAR marker is  
466 induced in both tobacco plant cultivars. It is also interesting to highlight the increased  
467 expression of transcripts from the hydrolytic  $\beta$ -1,3-endoglucanases (*PR-2*), commonly  
468 activated in a fungal infection and another classical SAR marker, by treatment with  
469 pGM. Activation of this gene is directly related to an antimicrobial effect due to  
470 hydrolysis of  $\beta$ -1-3 glucans of the fungal wall, altering its integrity. Like  $\beta$ -1-3  
471 endoglucanase, mRNAs of *PR-3* or chitinase, another well-known antifungal protein,  
472 were strongly upregulated after 72 h of pGM treatment in both Xanthi and SR1 cv.  
473 SINDELAROVA & SINDECOR [40] reported that both *PR-2a* and *PR-3* from  
474 *Nicotiana tabacum* showed strong antiviral activity against TMV. In addition,  
475 peroxidase and PAL transcripts, which were also strongly induced in our treated plants,  
476 have also been shown to present antiviral activity [32, 41]. PAL may be induced by  
477 ROS accumulation and is also considered an SAR component and a key enzyme in  
478 defense, leading to the synthesis of antimicrobial molecules, including phytoalexins and  
479 pathogen-related proteins and to the strengthening of the physical barrier against  
480 pathogen colonization by deposition of structural polymers, such as lignin and callose,  
481 at the infection site [42, 43]. The upregulation of *PR1- $\alpha$* , *PR-2*, *PR-3*, *peroxidase* and  
482 *PAL* genes observed after pGM treatment may explain the antiviral effects observed in  
483 our TMV infection assays for both Xanthi and SR1 tobacco plants. Interestingly, Xanthi  
484 and SR1 plants, however, showed differences in the time when these genes reached  
485 their peak of induction. Apparently, the NN Xanthi cv. recognizes the fungal elicitor  
486 faster than plants from SR1 cv.. Besides that, in Xanthi, the level of expression of these  
487 genes were also higher than in SR1, with exception to *PR-3* and *PAL*. In combination,  
488 these data suggest that Xanthi may be more prepared to respond against the pGM  
489 PAMP/MAMP than SR1. However further experiments would be necessary to test this  
490 hypothesis. As well, genome-wide transcriptome sequencing of pGM treated and

491 untreated samples would provide a better insight into the genes underlying pGM-  
492 mediated defense response.

493

## 494 **Conclusions**

495 The results obtained in this work allow us to suggest that *C. herbarum* pGM is a  
496 fungus PAMP able to induce the expression of *PRs* and *PAL*, *LOX* and *NtPrxNI* and to  
497 activate other classical SAR markers, such as ROS induction and protection against  
498 infection. Due to the importance of PR proteins in biotic and even abiotic stress  
499 tolerance, several researchers are trying to obtain multi tolerant transgenic plants by  
500 individual or dual PR overexpression (reviewed by [44]). Our data show that treatment  
501 with pGM may induce at least four *PR* genes simultaneously that help plants resist  
502 pathogen attack.

503

## 504 **Author contributions**

505 Conceptualization: CBM, MFSV and EB-B. Formal analysis: CBM, BBM, MFSV and  
506 EB-B. Funding acquisition: MFSV and EB-B. Investigation: CBM. Methodology:  
507 CBM, TFS. Project administration: MFSV and EB-B. Resources: MFSV and EB-B.  
508 Supervision: MFSV and EB-B. Writing – original draft: CBM, MFSV and EB-B.  
509 Writing – review & editing: CBM, TFS, EB-B and MFSV.

## 510 **Conflict of interest**

511 The authors declare that they have no conflict of interest.

512

## 513 **References**

- 514 **1** JONES JD, DANGL JL. The plant immune system. *Nature* 2006;444: 323-329.
- 515 **2** TSUDA K, KATAGIRI F. Comparing signaling mechanisms engaged in pattern-  
516 triggered and effector-triggered immunity. *Curr Opin Plant Biol.* 2010; 13: 459-465.  
517 doi: 10.1016/j.pbi.2010.04.006
- 518 **3** LI B, HU F, ZHANG Q, ZHANG X, HONG Y. A cellular gene as a double  
519 surveillance agent for plant to combat pathogen. *Plant Signal Behavior* 2013;8: 10



- 520 **4** FU ZQ, DONG X. Systemic acquired resistance: turning local infection into global  
521 defense. *Annu Rev Plant Biol.* 2013;6: 839-863
- 522 **5** MUTHAMILARASAN M, PRASAD M. Plant innate immunity: an updated insight  
523 into defense mechanisms. *J Biosci.* 2013;38(2): 433-449
- 524 **6** SHAH J, ZEIER J. Long-distance communication and signal amplification in systemic  
525 acquired resistance. *Front Plant Sci.* 2013;4: 30
- 526 **7** KAMATHAM S, NEELA KB, PASUPULATI AK, PALLU R, SINGH SS,  
527 GUDIPALLI P. Benzoylsalicylic acid isolated from seed coats of *Givotiarottleriformis*  
528 induces systemic acquired resistance in tobacco and Arabidopsis. *Phytochemistry*  
529 2016;126: 11-22 doi: 10.1016/j.phytochem.2016.03.002
- 530 **8** KLESSIG DF, CHOI HW, DEMPSEY DA. Systemic acquired resistance and salicylic  
531 acid: past, present, and future. *MPMI* 2018;31(9): 871-888
- 532 **9** HEINZERLING L, FREW AJ, BINDSLEV-JENSEN C, BONINI S, BOUSQUET J,  
533 RESCIANI M, CARLSEN KH, VAN CAUWENBERGE P, DARSOW U, FOKKENS,  
534 WJ, HAAHTELA T, VAN HOECKE H, JESSBERGER B, KOWALSKI ML, KOPP,  
535 T, LAHOZ CN, LODRUP CARLSEN KC, PAPADOPOULOS NG, RING J,  
536 SCHMID-GRENDELMEIER P, VIGNOLA AM, WOHL S, ZUBERBIER T.  
537 Standard skin prick testing and sensitization to inhalant allergens across Europe-a  
538 survey from the GALEN network. *Allergy* 2005;60: 1287–1300
- 539 **10** FISCHER IH, REZENDE JAM. Diseases of passion flower (*Passifloras* pp.). Pest  
540 technology, ed. Global Science Books 2008
- 541 **11** WISE K, ALLEN T, CHILVERS M, FASKE T, FREIJE A, ISAKEIT T, MUELLER D,  
542 PRICE T, AGCENTER L, SISSON A, SMITH D, TENUTA A, WOLOSHUK C. Corn  
543 disease management CPN2001. Crop Protection Network. [https://crop-protection-](https://crop-protection-network.s3.amazonaws.com/publications/cpn-2001-ear-rots.pdf)  
544 [network.s3.amazonaws.com/publications/cpn-2001-ear-rots.pdf](https://crop-protection-network.s3.amazonaws.com/publications/cpn-2001-ear-rots.pdf) 2016
- 545 **12** SUSSEL AAB. Estudo da epidemiologia da verrugose-do-maracujazeiro. Embrapa  
546 Cerrados, Ed. EMBRAPA, Brasília, DF. 2015
- 547 **13** VIANA FMP, FREIRE FCO, CARDOSO JE, VIDAL JC. Principais doenças do  
548 maracujazeiro na região nordeste e seu controle. Comunicado Técnico on line 86, ISSN  
549 1679-6535 Fortaleza, CE. 2003
- 550 **14** CABIB E, BOWERS B, SBURLATI A, SIVERMAN SJ. Fungal cell wall synthesis:  
551 the construction of a biological structure. *Microbiol Sci* 1988; 5(12): 370-375
- 552 **15** FUKUDA EK, VASCONCELOS AFD, MATIAS AC, BARBOSA AM, DEKKER  
553 RFH, SILVA MLC. Fungal cell wall polysaccharides: purification and characterization.  
554 *Semina: Ciências Agrárias* 2009; 30(1): 117-134
- 555 **16** LATGÉ JP. Tasting the fungal cell wall. *Cell Microbiol* 2010;12(7): 863-872
- 556 **17** BARRETO-BERGTER E, FIGUEIREDO RT. Fungal glycans and the innate immune  
557 recognition. *Front Cell Infect Microbiol* 2014;4: 145
- 558 **18** KLIS FM, BOORSMA A, DEGROOT PWJ. Cell wall construction in *Saccharomyces*  
559 *cerevisiae*. *Yeast* 2006;23(3): 185–202
- 560 **19** LLOYD KO. Isolation, characterization and partial structure of peptidogalactomannan  
561 from the yeast form of *Cladosporium werneckii*. *Biochem.* 1970;9: 3446-3453

- 562 **20** LEITAO EA, BITTENCOURT VCB, HAIDO RMT, VALENTE AP, PETER-  
563 KATALINIC J, LETZEL M, DE SOUZA LM, BARRETO-BERGTER E.  $\beta$ -  
564 galactofuranose-containing *O*-linked oligosaccharides present in the cell wall  
565 peptidogalactomannan of *Aspergillus fumigatus* contain immuno dominant epitopes.  
566 *Glycobiology* 2003;13: 681-692
- 567 **21** SHIBATA N, SAITOH T, TADOKORO Y, OKAWA Y. The cell wall galactomannan  
568 antigen from *Malassezia furfur* and *Malassezia pachydermatis* contains beta-1,6-linked  
569 linear galactofuranosyl residues and its detection has diagnostic potential. *Microbiol.*  
570 2009;155: 3420-3429
- 571 **22** CALIXTO ROR, MATTOS BB, BITTENCOURT V, LOPES L, SOUZA L,  
572 SASSAKI, G, CIPRIANI T, SILVA M, BARRETO-BERGTER E.  $\beta$ -Galactofuranose  
573 containing structures present in the cell wall of the saprophytic fungus *Cladosporium*  
574 (*Hormoconis*) *resinae*. *Res Microbiol* 2010;161(8): 720-728
- 575 **23** MATTOS BB, MONTEBIANCO C, ROMANEL E, SILVA TF, BERNABÉ RB,  
576 SIMAS-TOSIN F, SOUZA LM, SASSAKI GL, VASLIN MFS, BARRETO-  
577 BERGTER E. A peptidogalactomannan isolated from *Cladosporium herbarum* induces  
578 defense related genes in BY-2 tobacco cells. *Plant Physiol Biochem* 2018;126: 206-216
- 579 **24** FU Y, YIN H, WANG W, WANG M, ZHANG H, ZHAO X, DU Y.  $\beta$ -1,3-  
580 Glucan with different degrees of polymerization induced different defense responses in  
581 tobacco. *Carbohydr Polym.* 2011;86: 774-782
- 582 **25** DIJKSTRA J, JAGER CD. Practical Plant Virology. Protocols and Exercises.  
583 Springer Lab Manuals, Springer. 1998
- 584 **26** OTSUKI Y, SHIMOMURA T, TAKEBE I. *Tobacco mosaic virus* multiplication and  
585 expression of the N gene in necrotic responding tobacco varieties. *Virology* 1972; 50:  
586 45-50
- 587 **27** MCKINNEY HH. Influence of soil temperature and moisture on infection of wheat  
588 seedlings by *Helminthosporium sativum*. *J. Agric. Res.* 1923;26: 195–218
- 589 **28** BOURNONVILLE CFG, DÍAZ-RICCI JC. Quantitative determination of superoxide  
590 in plant leaves using a modified NBT staining method. *Phytochem Anal.* 2011;22: 268–  
591 271
- 592 **29** LIVAK KJ, SCHMITTGEN TD. Analysis of relative gene expression data using real-  
593 time quantitative PCR and the  $2^{-\Delta\Delta C_t}$  method. *Methods* 2001;25: 402-408  
594 <https://doi.org/10.1006/meth.2001.1262>
- 595 **30** LIAO YW, SUN ZH, ZHOU YH, SHI K, LI X, ZHANG GQ, XIA XJ, CHEN ZX, YU  
596 JQ. The role of hydrogen peroxide and nitric oxide in the induction of plant-encoded  
597 RNA-dependent RNA polymerase 1 in the basal defense against *Tobacco mosaic*  
598 *virus*. *PLoS One* 2013;8:e76090. <https://doi.org/10.1371/journal.pone.0076090>
- 599 **31** DENG XG, ZHU T, ZOU LJ, HAN XY, ZHOU X, XI DH, ZHANG DW, LIN HH.  
600 Orchestration of hydrogen peroxide and nitric oxide in brassinosteroid-mediated  
601 systemic virus resistance in *Nicotiana benthamiana*. *Plant J.* 2016;89: 478-493  
602 <https://doi.org/10.1111/tpj.13120>

- 603 **32** HYODO K, SUZUKI N, MISE K, OKUNO T. Roles of superoxide anion and  
604 hydrogen peroxide during replication of two unrelated plant RNA viruses in *Nicotiana*  
605 *benthamiana*. Plant Signal Behavior 2017;12: 6
- 606 **33** BAILLIEUL F, GENETAT I, KOPP M, SAINDRENAN P, FRITIG B.  
607 KAUFFERNANN S. A new elicitor of the hypersensitive response in tobacco: a fungal  
608 glycoprotein elicits cell death, expression of defence genes, production of salicylic acid,  
609 and induction of systemic acquired resistance. Plant J. 1995;8(4): 551-560
- 610 **34** CORDELIER S, de RUFFRAY P, FRITIGAND B, KAUFFMANN S. Biological and  
611 molecular comparison between localized and systemic acquired resistance induced in  
612 tobacco by a *Phytophthora megasperma* glycoprotein elicitor. Plant Mol Biol. 2003;51:  
613 109–118
- 614 **35** ZHANG Y, ZHANG Y, QIU D, ZENG H, GUO L, YANG X. BcGs1, a glycoprotein  
615 from *Botrytis cinerea*, elicits defence response and improves disease resistance in host  
616 plants. Biochemical and Biophysical Res Commun. 2015; 457: 627-634
- 617 **36** PENG DH, QIU DW, RUAN LF, ZHOU CF, SUN M. Protein elicitor PemG1 from  
618 *Magnaporthe grisea* induces systemic acquired resistance (SAR) in plants. MPMI  
619 2011;24:(10): 1239-1246
- 620 **37** LI S, NIE H, QIU D, SHI M, YUAN Q (2019) A novel protein elicitor PeFOC1 from  
621 *Fusarium oxysporum* triggers defense response and systemic resistance in tobacco.  
622 Biochem Biophys Res Commun 514:1074-1080
- 623 **38** KWAK AM, MIN KJ, LEE SY, KANG HW. Water extract from spent mushroom  
624 substrate of *Hericium erinaceus* suppresses bacterial wilt disease of tomato.  
625 Microbiology 2015;43(3): 311-318
- 626 **39** LIU Y, LIU Q, TANG Y, DING W. NtPR1a regulates resistance to *Ralstonia*  
627 *solanacearum* in *Nicotiana tabacum* via activating the defense-related genes. Biochem.  
628 Biophys Res Commun. 2019;508: 940-945
- 629 **40** SINDELAROVA M, SINDELAR L. Isolation of pathogenesis-related proteins from  
630 TMV-infected tobacco and their influence on infectivity of TMV. Plant Prot Sci. 2005;  
631 41: 52-57
- 632 **41** MAKSIMOV IV, SOROKAN AV, BURKHANOVA GF, VESELOVA SV, YU AV,  
633 SHEIN MY, AVALBAEV AM, DHAWARE PD, MEHETRE GT, SINGH BP,  
634 KHAIRULLINR M. Mechanisms of plant tolerance to RNA viruses induced by plant-  
635 growth-promoting microorganisms. Plants 2019;8:575. doi:10.3390/plants8120575
- 636 **42** ZHAO XM, SHE XP, YU W, LIANG XM, DU YG. Effects of oligochitosans on  
637 tobacco cells and role of endogenous nitric oxide burst in the resistance of tobacco to  
638 Tobacco mosaic virus. Plant Pathol J. 2007;89(1): 55-65
- 639 **43** NAZ R, BANO A, WILSON NL, GUEST D, ROBERTS TH. Pathogenesis-related  
640 protein expression in the apoplast of wheat leaves protected against leaf rust following  
641 application of plant extracts. Phytopathology 2014;104: 933-944
- 642 **44** ALI S, GANAI BA, KAMILI AN, BHAT AA, MIR ZA, BHAT, JA, TYAGI A, ISLAM  
643 ST, MUSHTAQ M, YADAV P, RAWAT S, GROVER A (2018) Pathogenesis-related  
644 proteins and peptides as promising tools for engineering plants with multiple stress  
645 tolerance. Microbiol Res 212-213:29-37

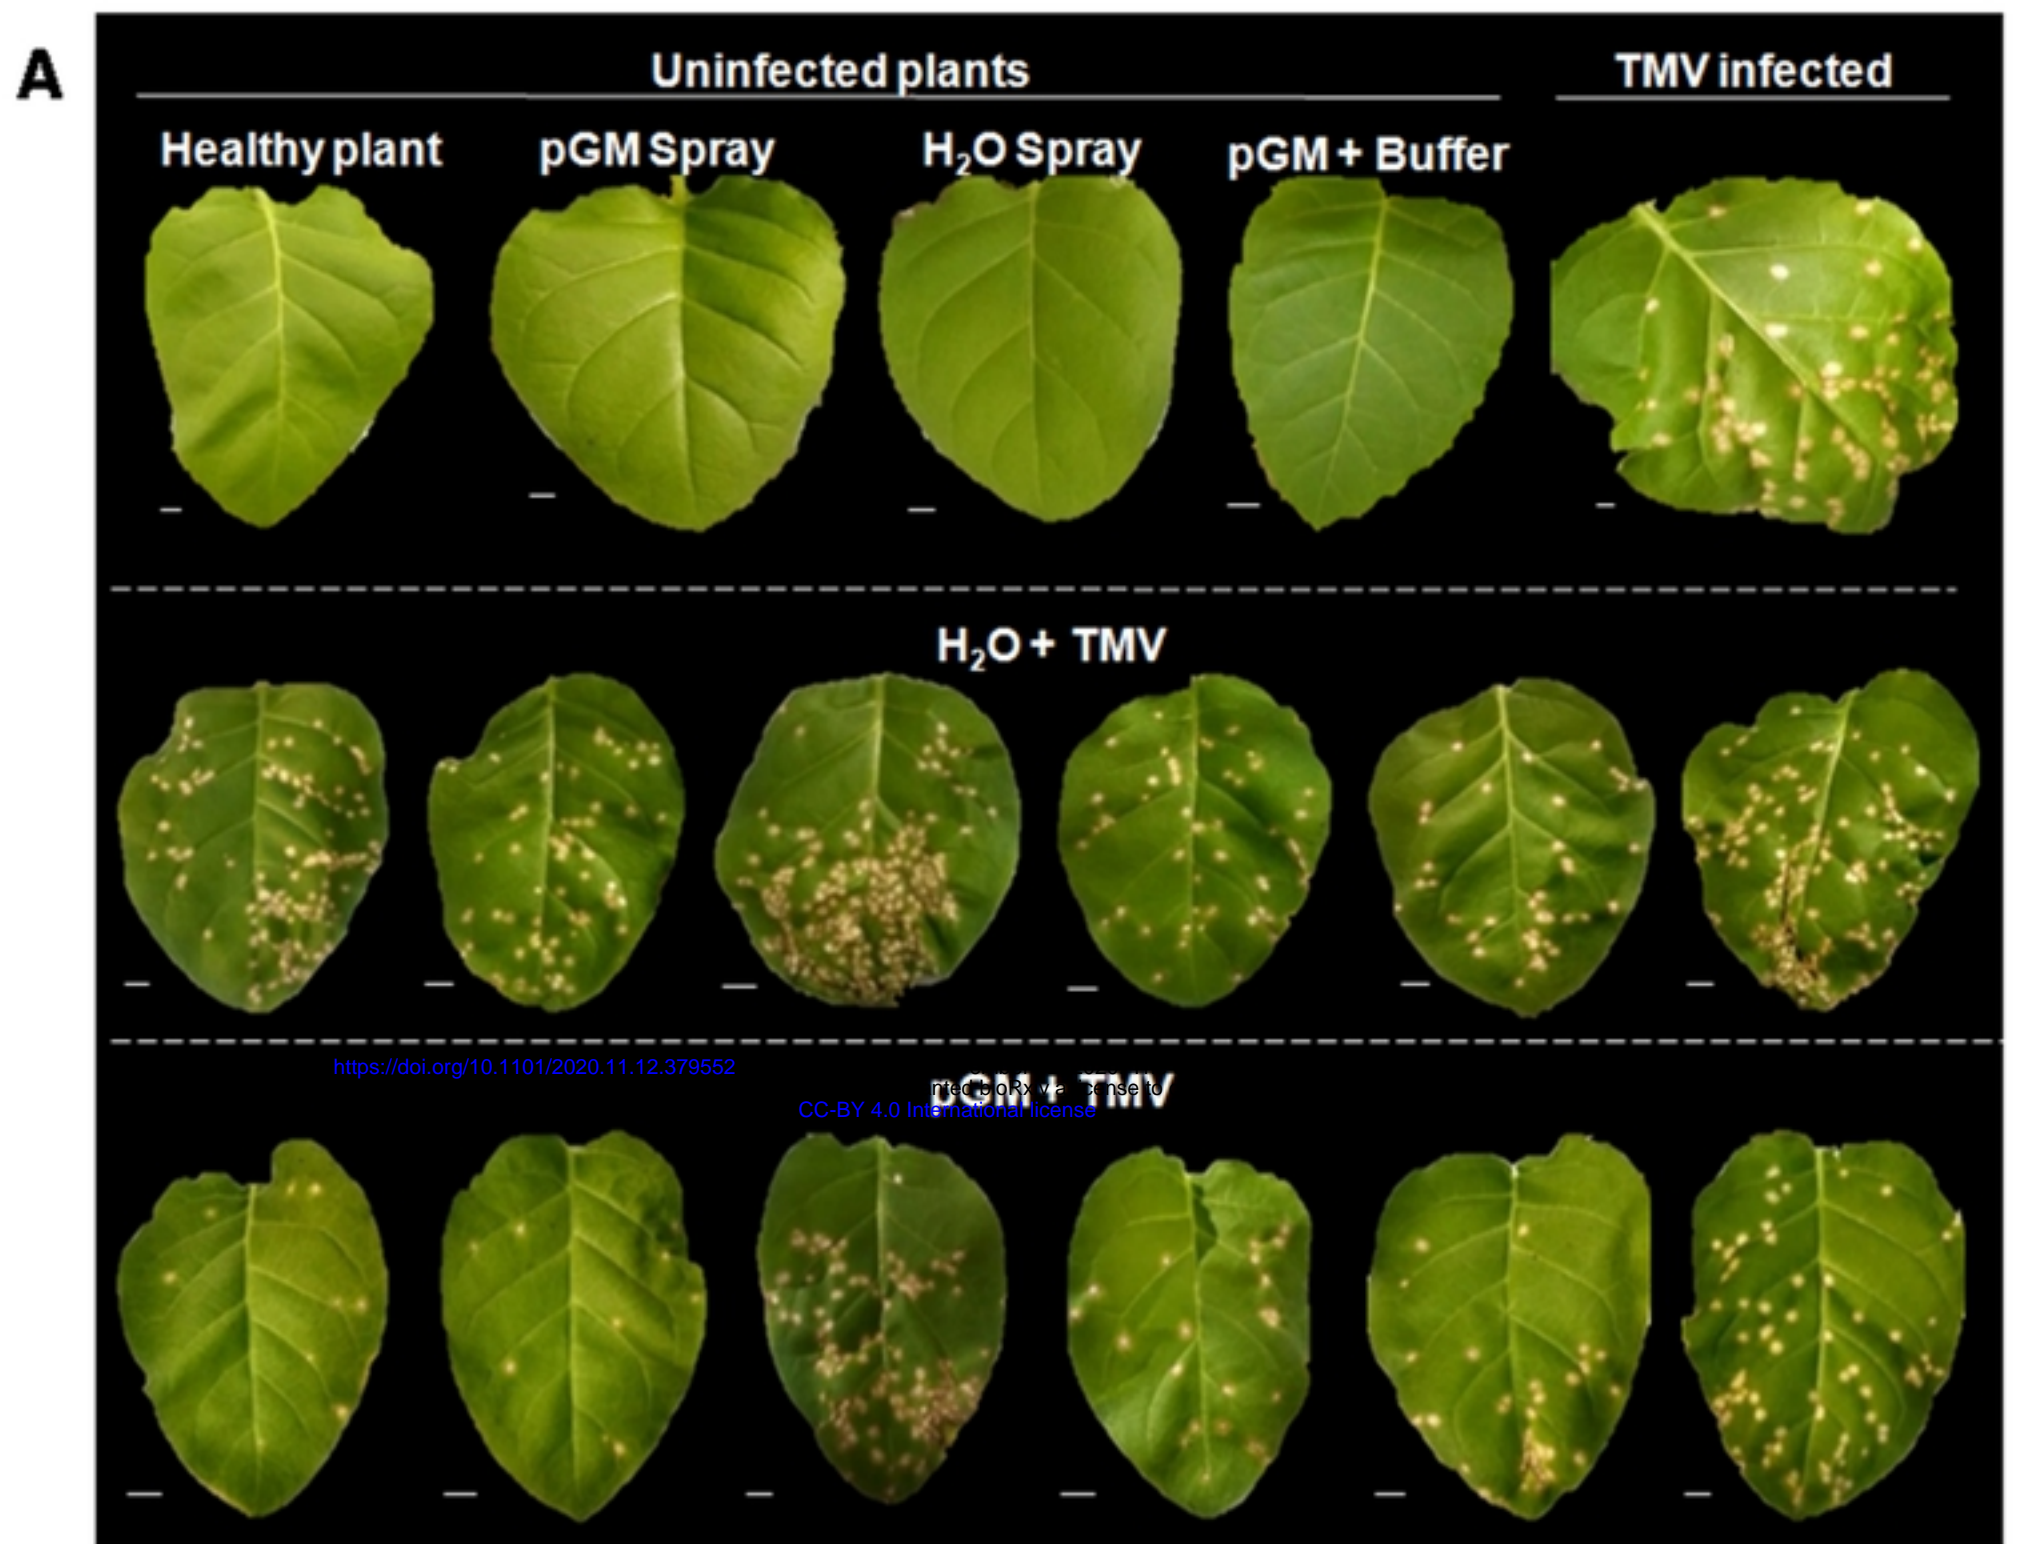

<https://doi.org/10.1101/2020.11.12.379552>

bioRxiv preprint doi: <https://doi.org/10.1101/2020.11.12.379552>; this version posted November 12, 2020. The copyright holder for this preprint (which was not certified by peer review) is the author/funder, who has granted bioRxiv a license to display the preprint in perpetuity. It is made available under aCC-BY 4.0 International license.

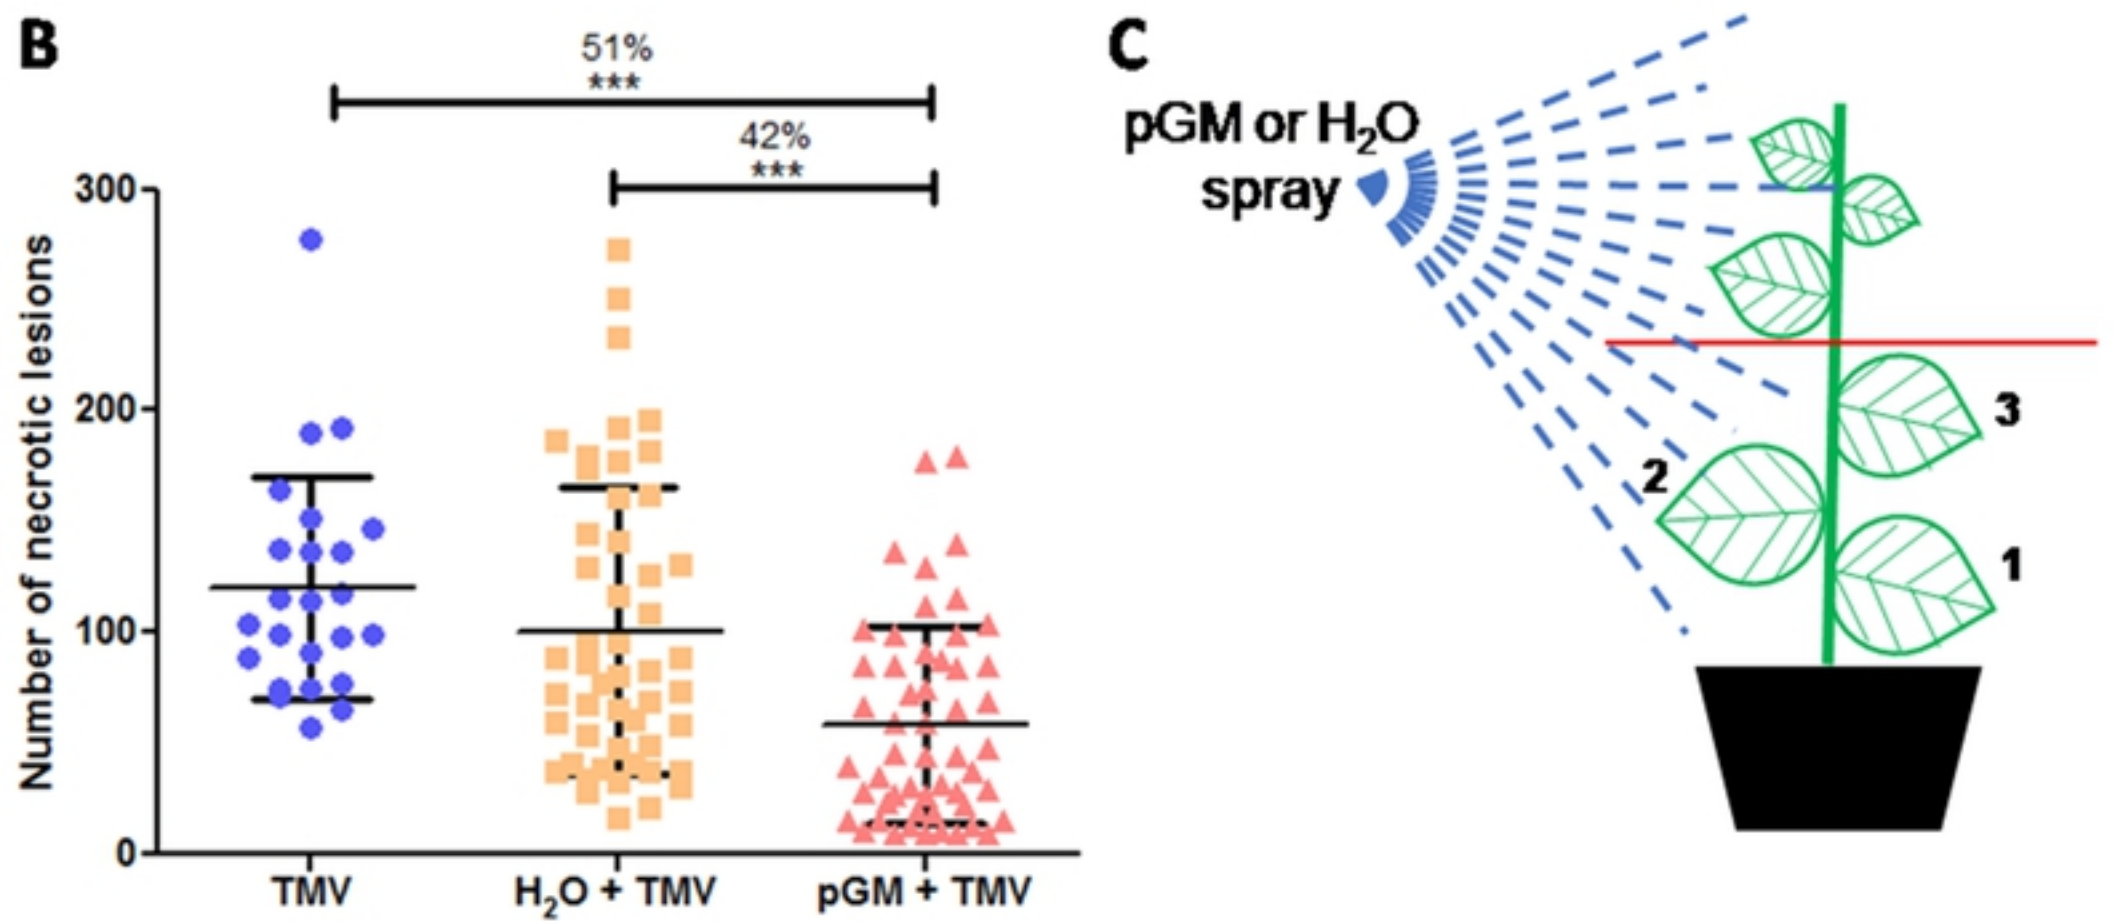

**D**

| Leave position   | TMV             | H <sub>2</sub> O + TMV | pGM + TMV      |
|------------------|-----------------|------------------------|----------------|
| 1                | 104,88 ± 71,16a | 52,61 ± 25,01b         | 55,11 ± 42,89b |
| 2                | 136,75 ± 40,99a | 133,59 ± 62,90a        | 72,61 ± 45,89b |
| 3                | 118,50 ± 31,16a | 121,53 ± 69,23a        | 46,76 ± 43,56b |
| Number of plants | 10              | 20                     | 20             |

Figure 1

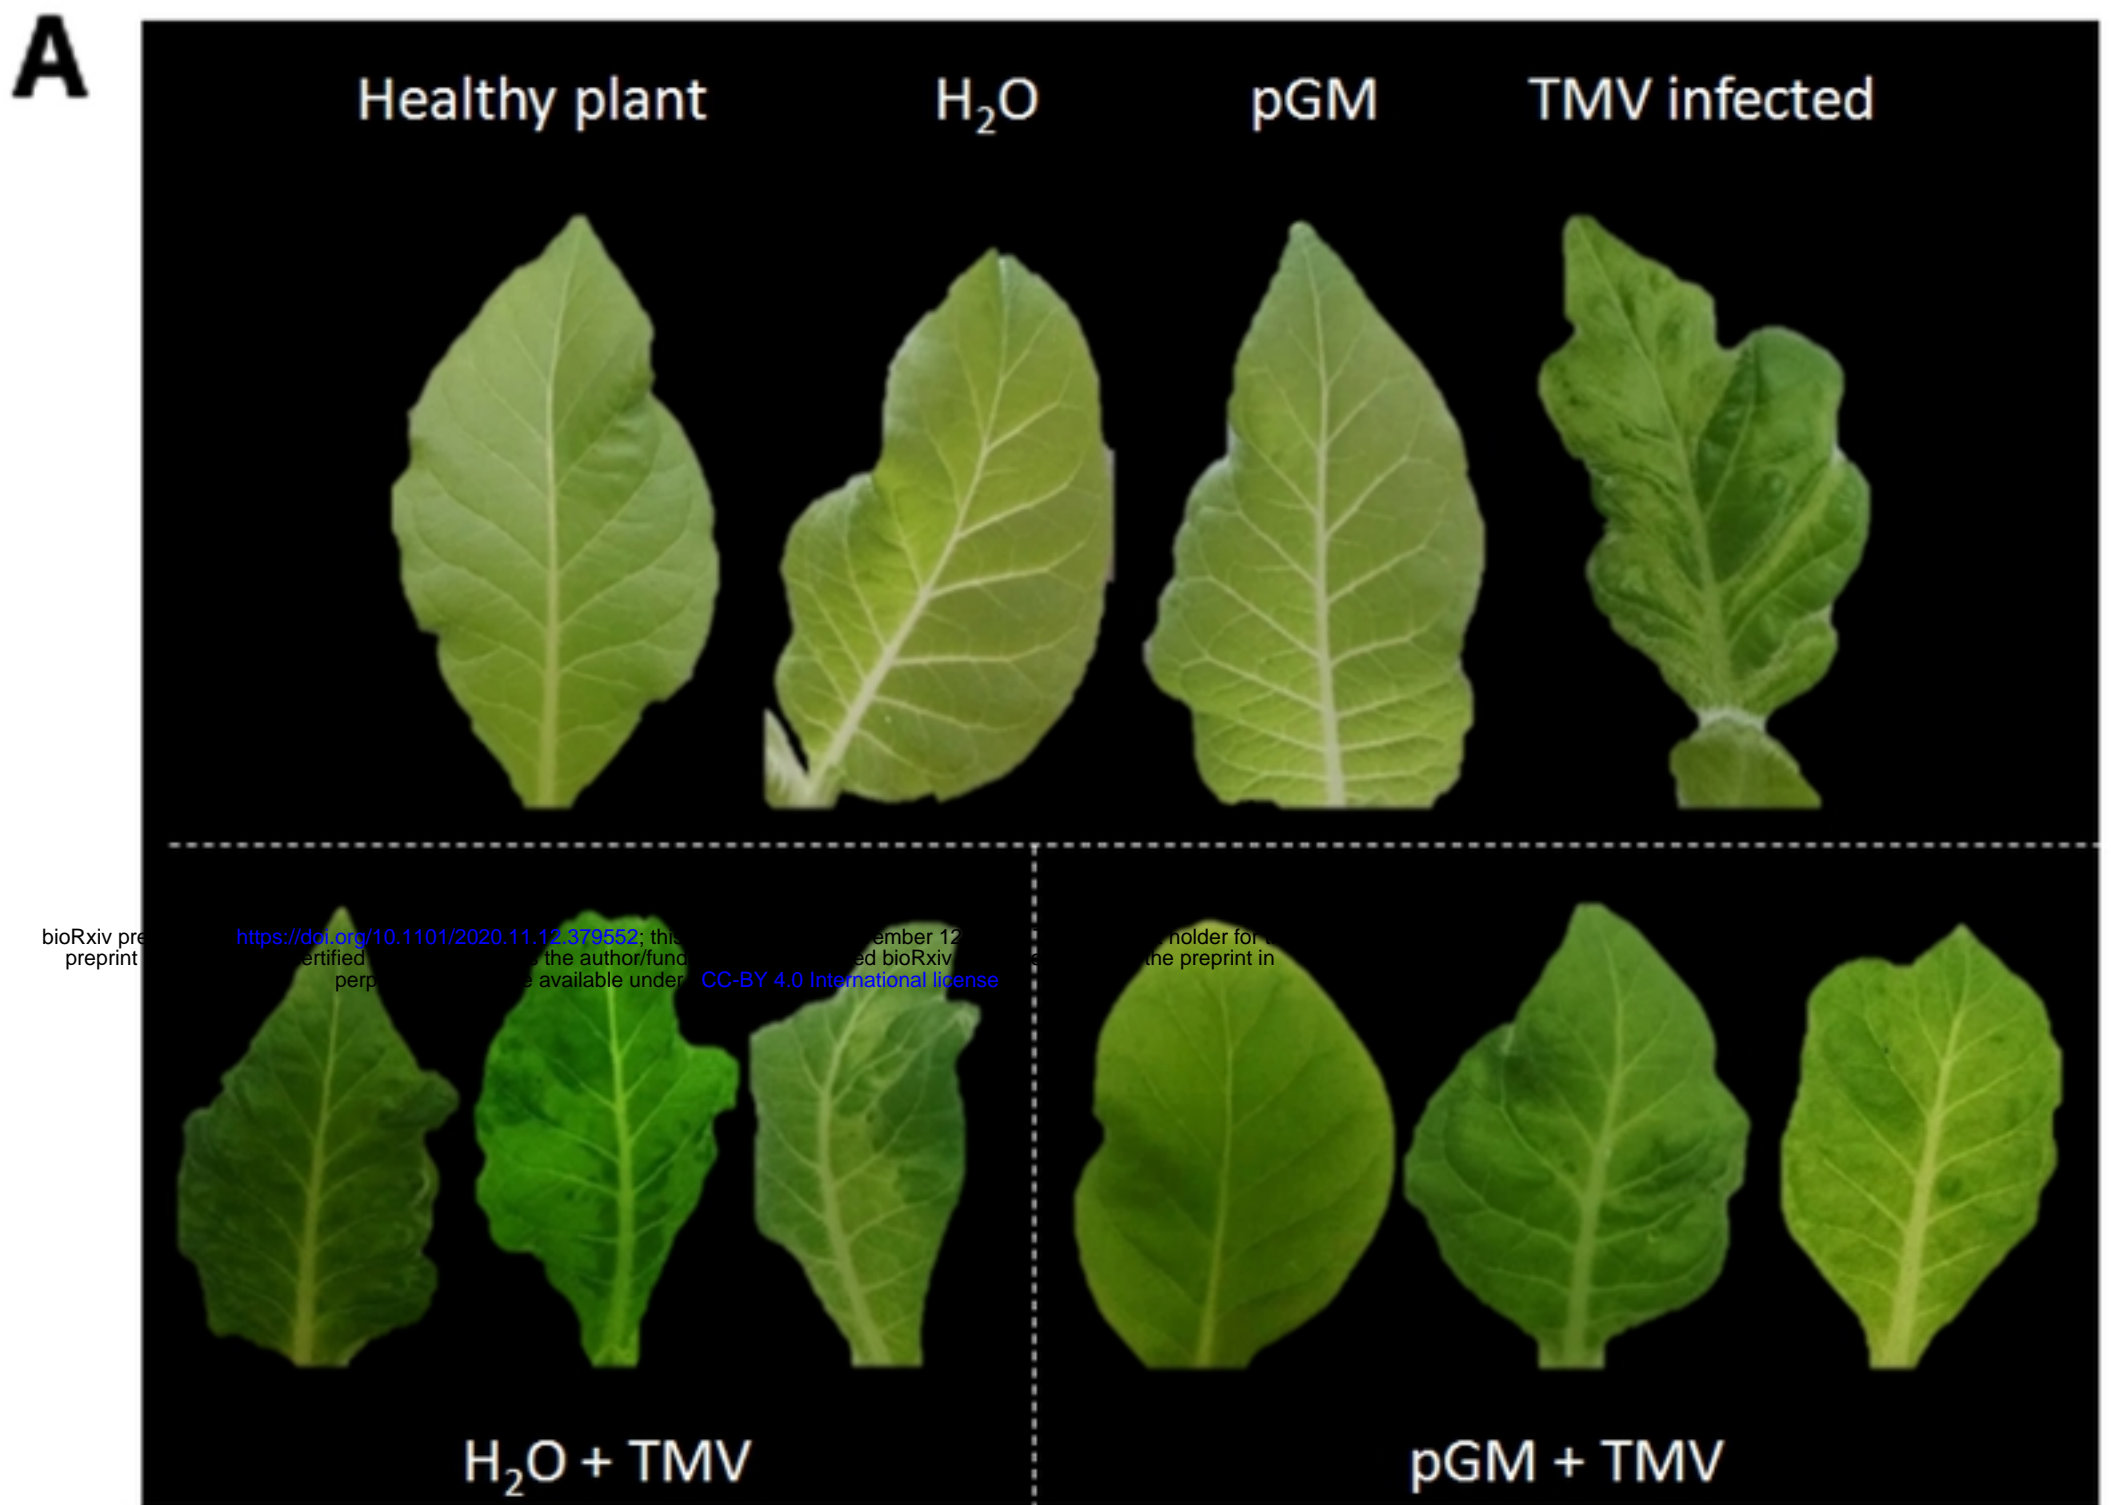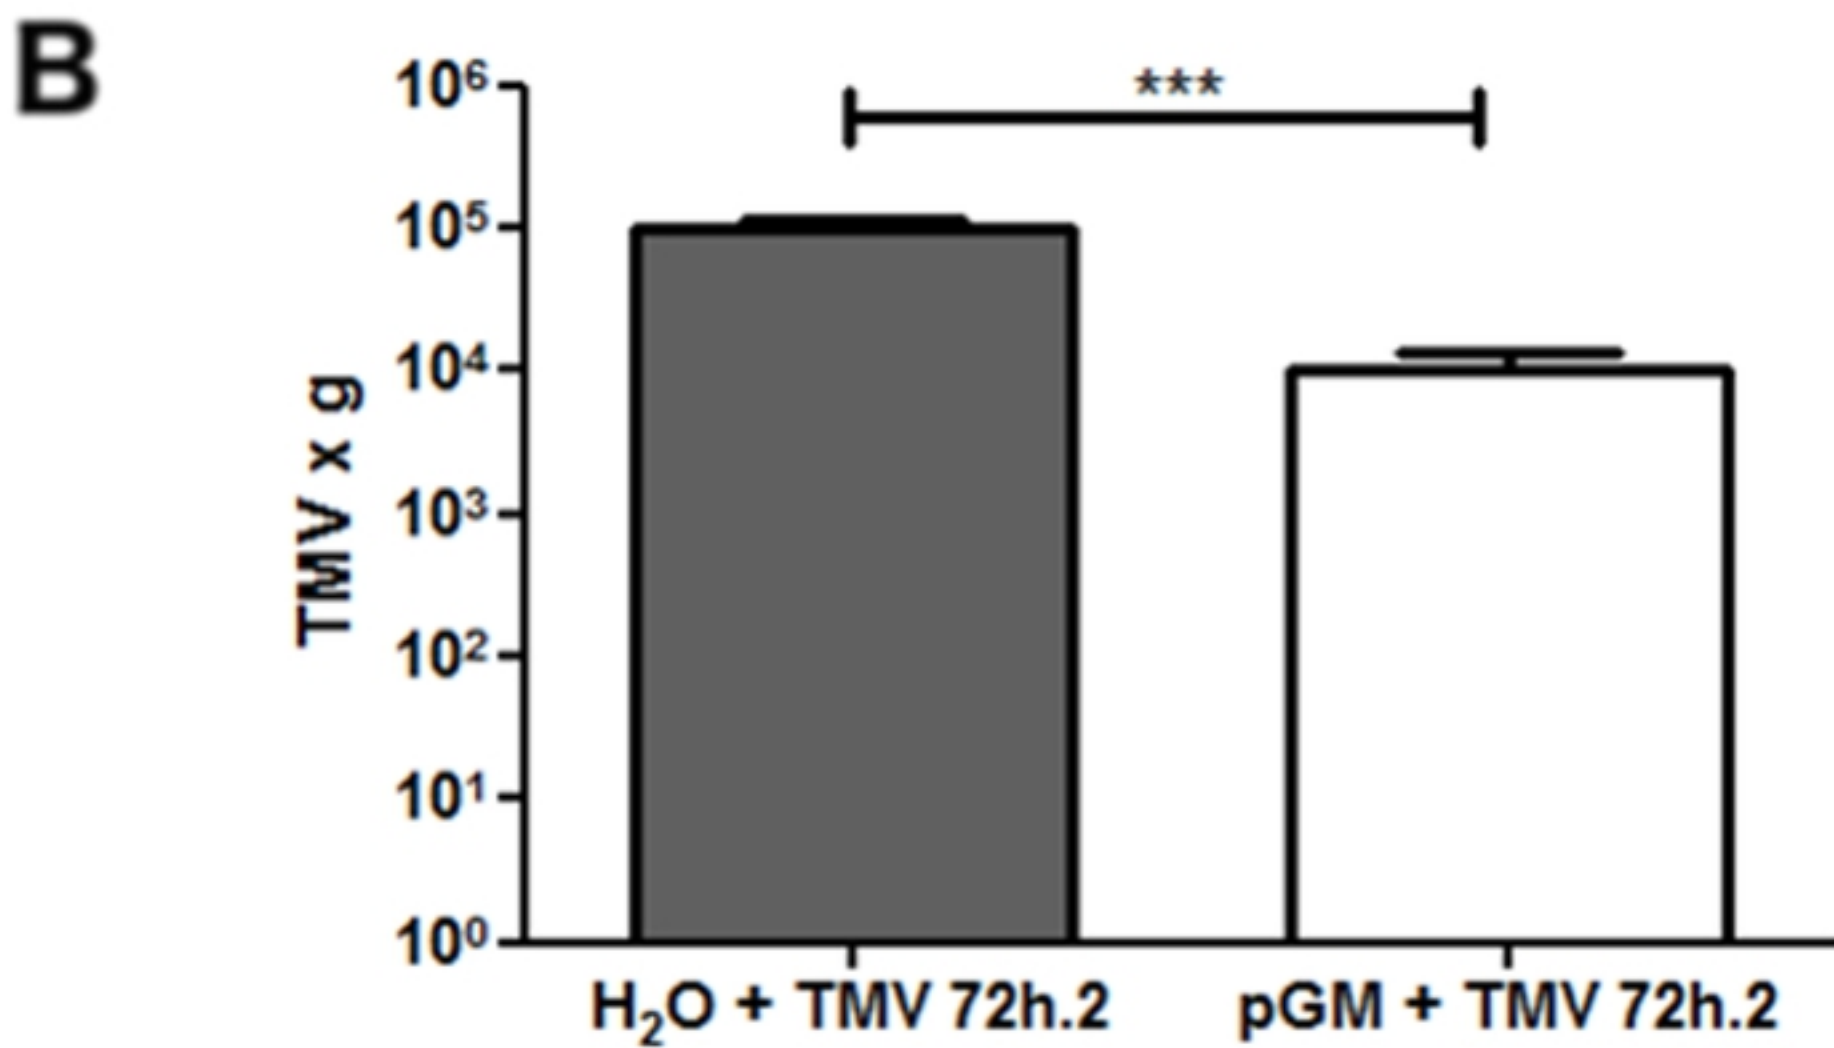

Figure 2

Healthy plant 100  $\mu\text{g.ml}^{-1}$  200  $\mu\text{g.ml}^{-1}$  400  $\mu\text{g.ml}^{-1}$  600  $\mu\text{g.ml}^{-1}$

1 dap

bioRxiv preprint doi: <https://doi.org/10.1101/2020.11.12.379552>; this version posted November 12, 2020. The copyright holder for this preprint (which was not certified by peer review) is the author/funder, who has granted bioRxiv a license to display the preprint in perpetuity. It is made available under aCC-BY 4.0 International license.

3 dap

8dap

10dap

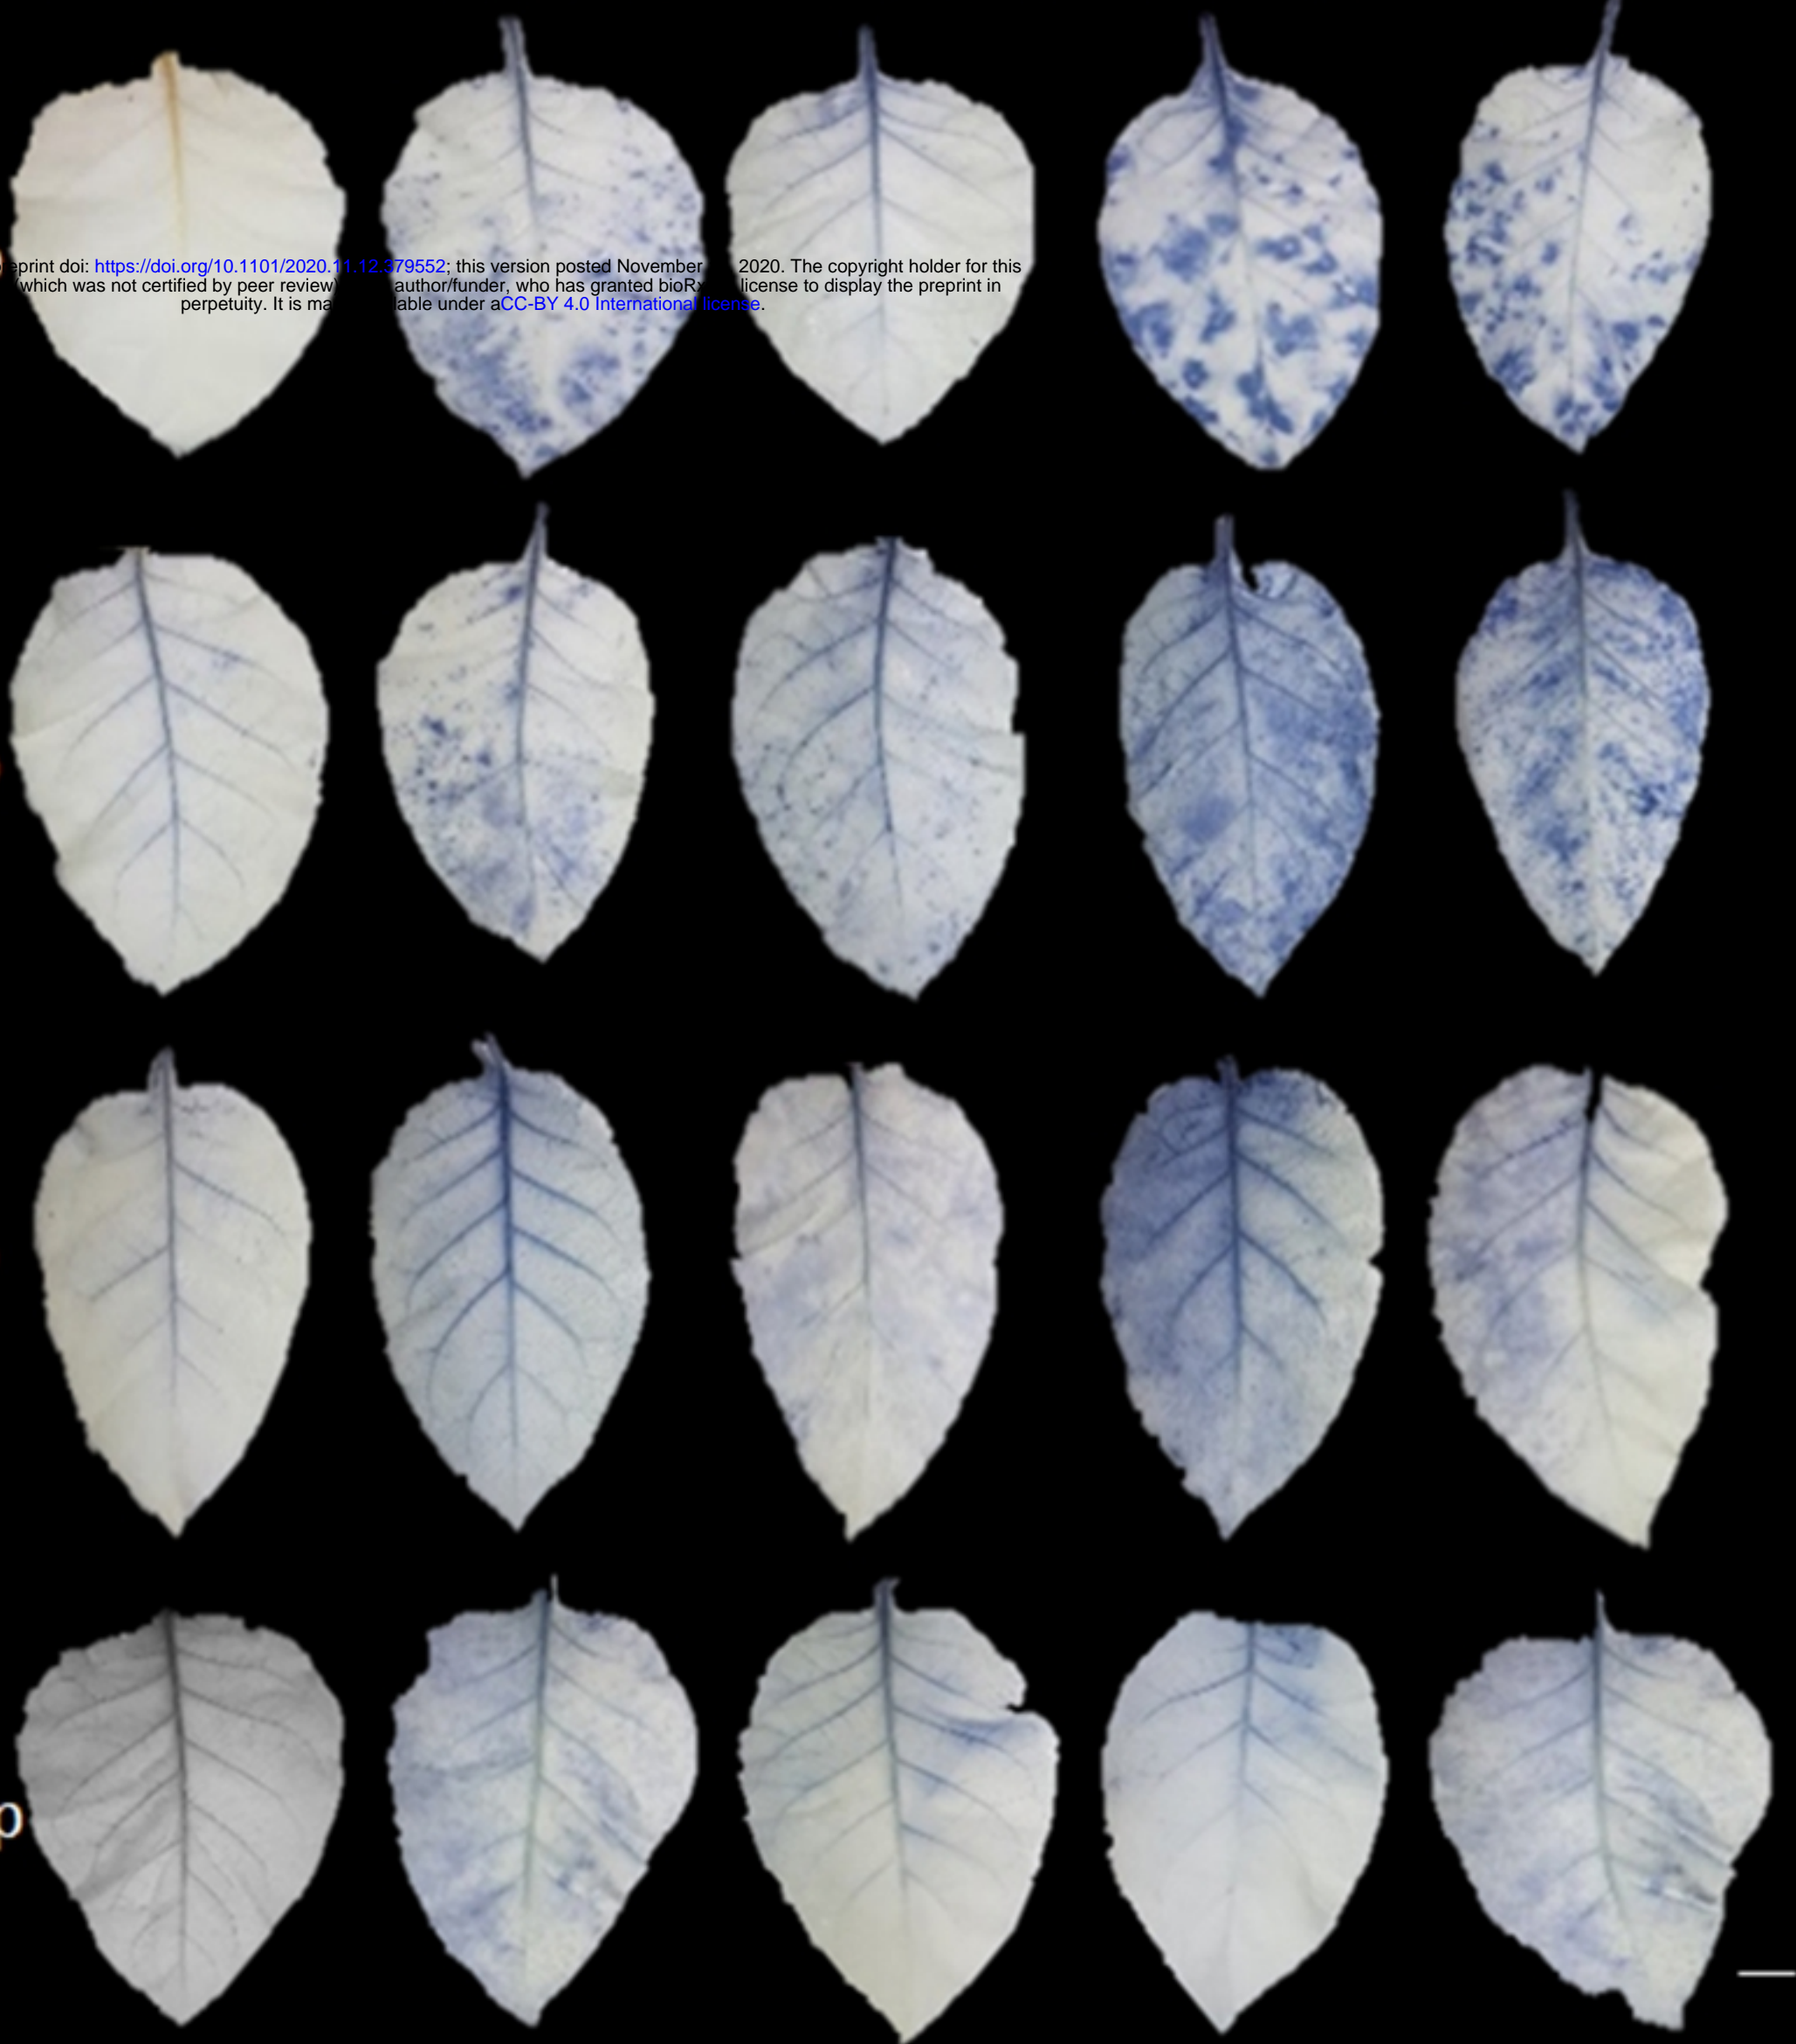

Figure 3

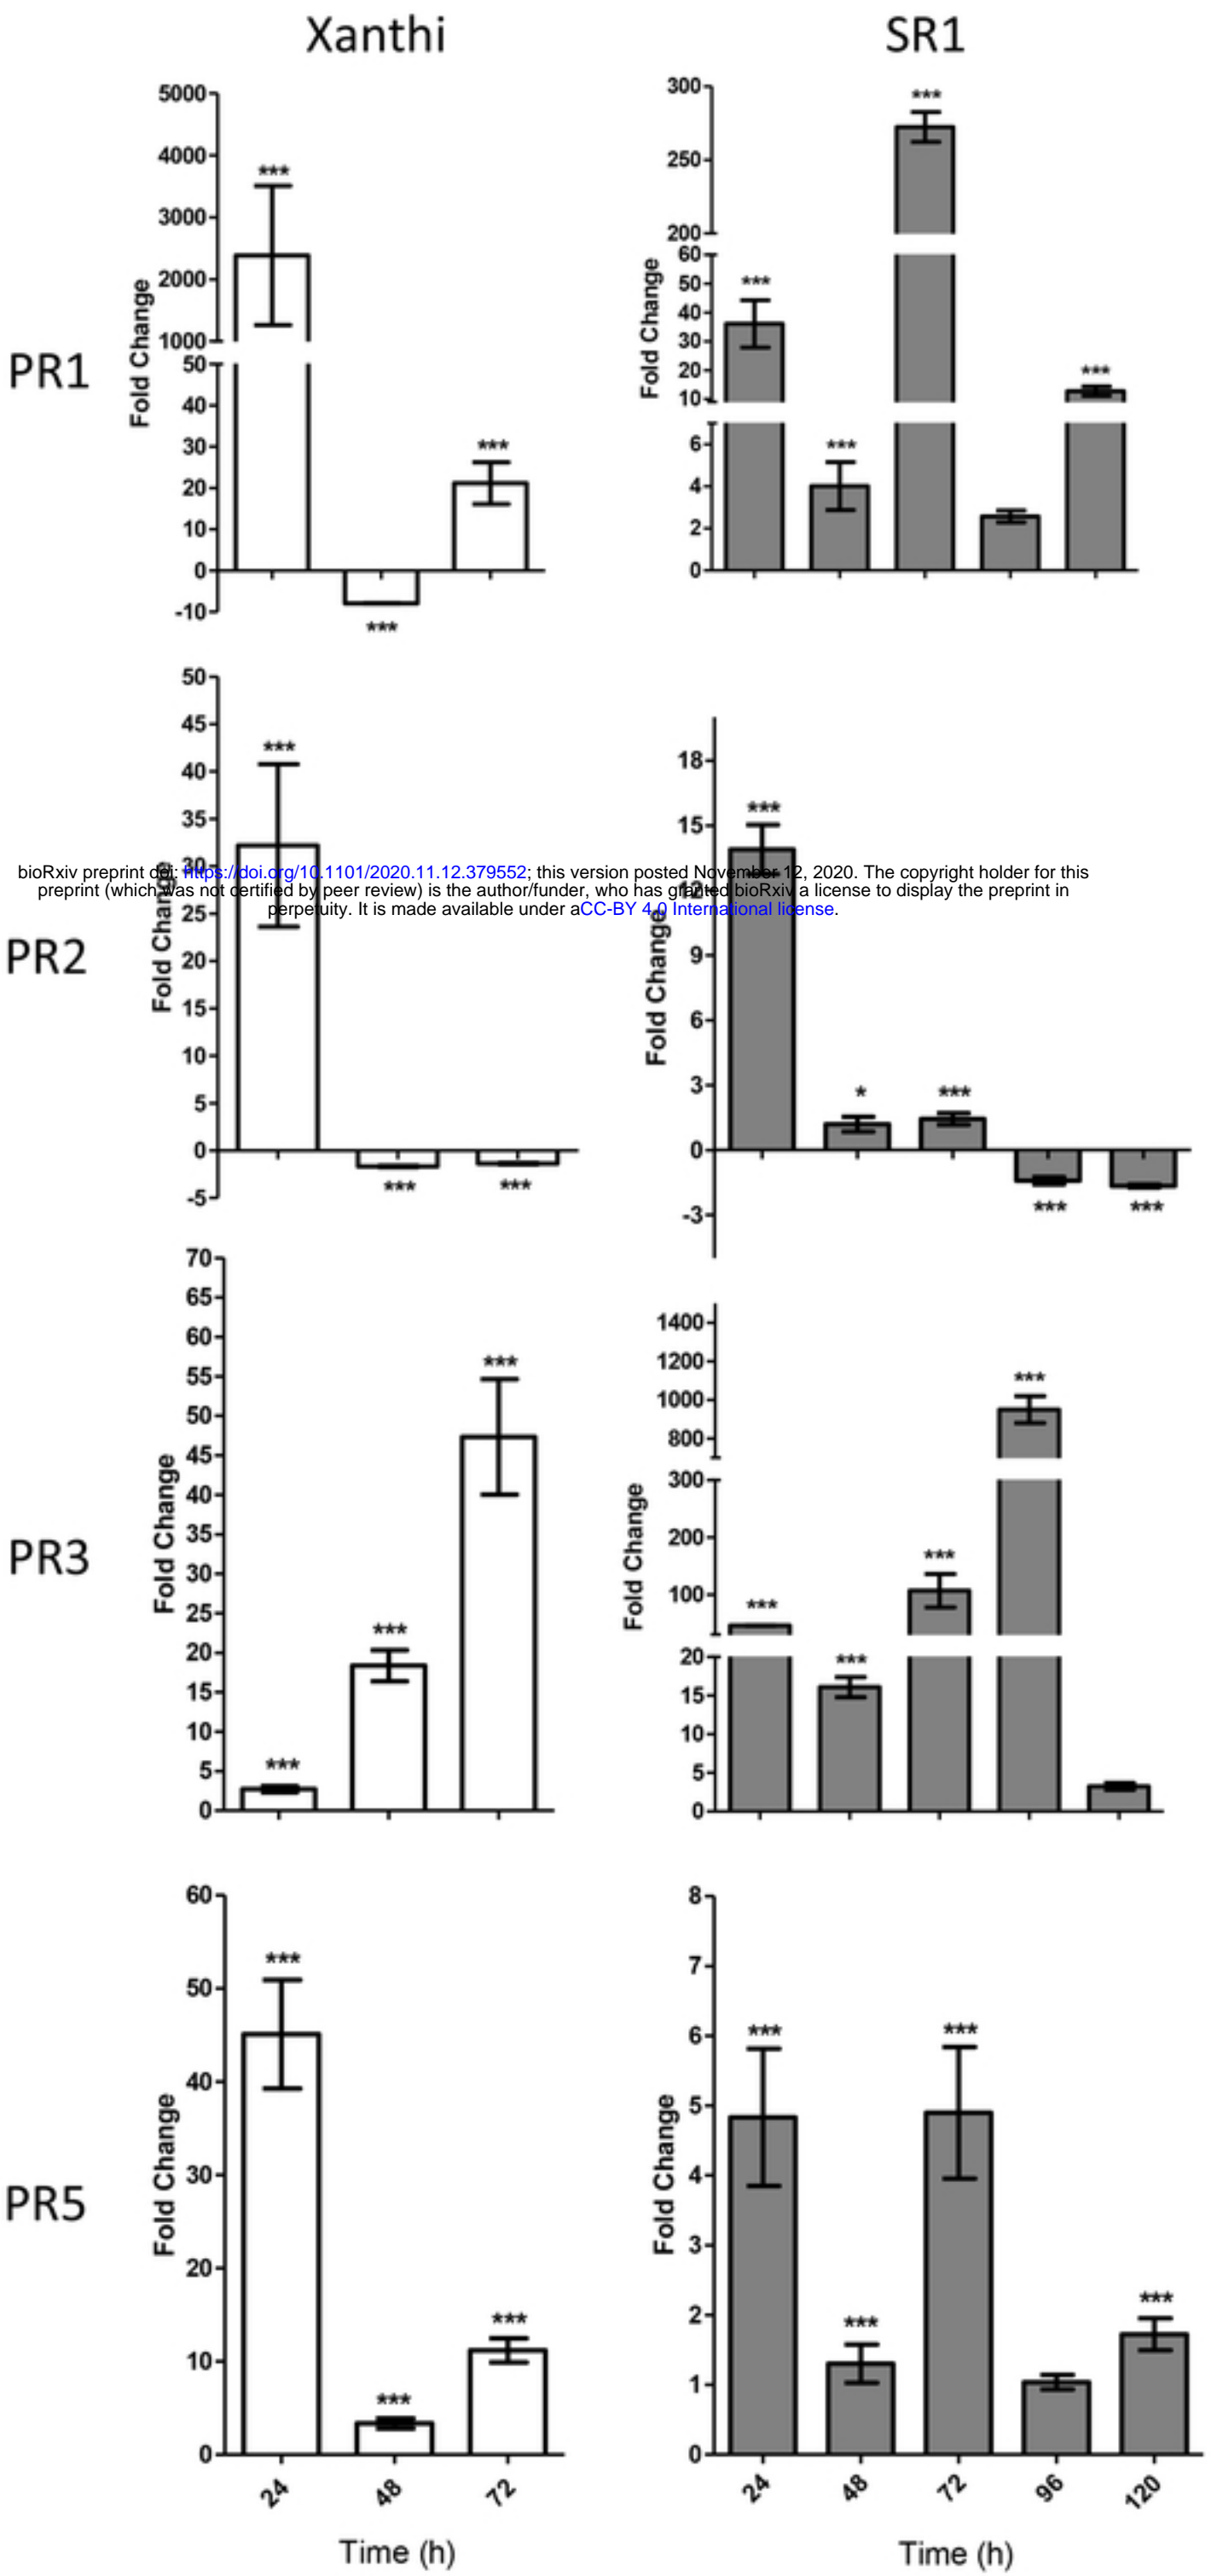

Figure 4

bioRxiv preprint doi: <https://doi.org/10.1101/2020.11.12.379552>; this version posted November 12, 2020. The copyright holder for this preprint (which was not certified by peer review) is the author/funder, who has granted bioRxiv a license to display the preprint in perpetuity. It is made available under aCC-BY 4.0 International license.

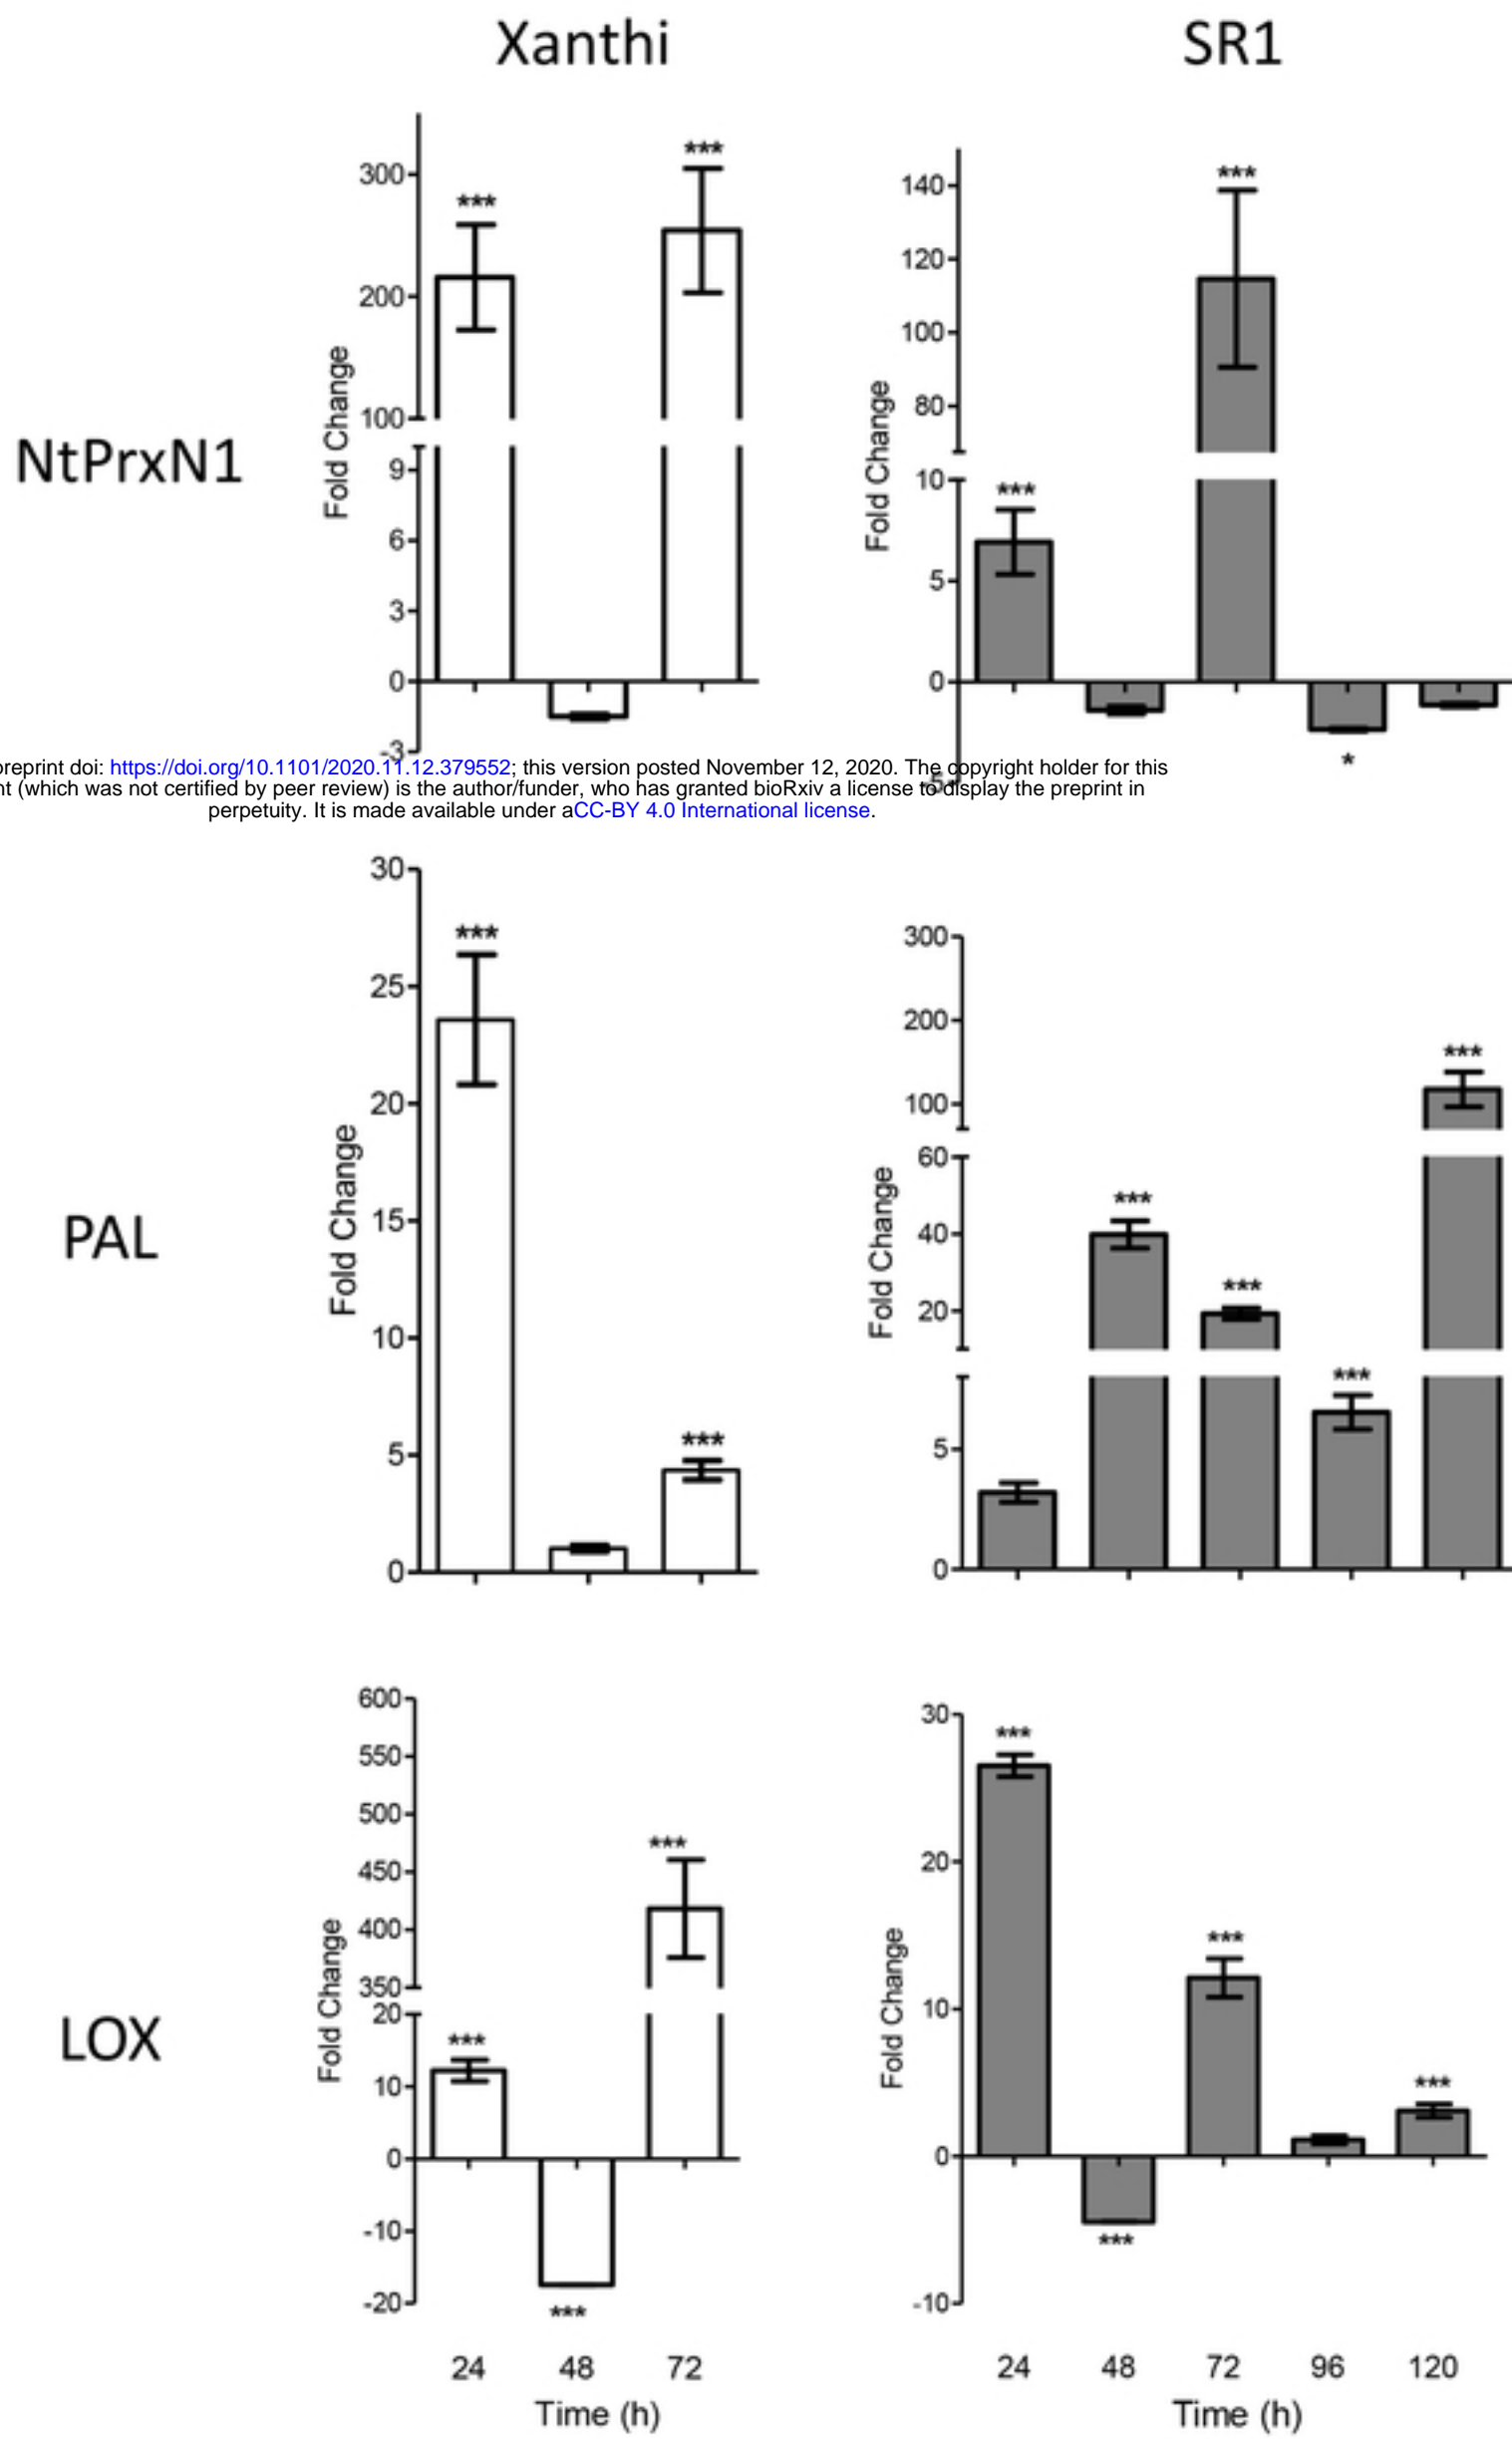

Figure 5
